# Supplementary material for: Achieving ultra-narrow bandgap non-halogenated non-fullerene acceptors via vinylene π-bridges for efficient organic solar cells
Source: Royal Society of Chemistry journal article supplement (doi:10.1039/d0ma01017k), 2021-01-01
Supplement: d0ma01017k1.pdf [file d0ma01017k1.pdf]

**Electronic supplementary information for:**

**Achieving ultra-narrow bandgap non-halogenated  
non-fullerene acceptor via vinylene  $\pi$ -bridges for efficient  
organic solar cells**

Jiefeng Hai,<sup>‡a</sup> Siwei Luo,<sup>‡d</sup> Han Yu,<sup>‡d</sup> Honggang Chen,<sup>c</sup> Zhenhuan Lu,<sup>b</sup> Ling Li,<sup>\*b</sup>  
Yingping Zou,<sup>\*c</sup> He Yan<sup>\*a, d</sup>

<sup>a</sup> *HKUST-Shenzhen Research Institute No. 9 Yuexing 1st Road, Hi-tech Park, Nanshan Shenzhen 518057, China. E-mail: hyan@ust.hk*

<sup>b</sup> *Guangxi Key Laboratory of Electrochemical and Magneto-Chemical Functional Materials, Guilin University of Technology, Guilin 541004, Guangxi, China. E-mail: 6614034@glut.edu.cn*

<sup>c</sup> *College of Chemistry and Chemical Engineering, Central South University, Changsha 410083, Hunan, China. E-mail: yingpingzou@csu.edu.cn*

<sup>d</sup> *Department of Chemistry and Hong Kong Branch of Chinese National Engineering Research Center for Tissue Restoration & Reconstruction, Hong Kong University of Science and Technology (HKUST), Clear Water Bay, Kowloon, Hong Kong, China*

<sup>‡</sup> *These authors contributed equally to this work.*

*\*Corresponding authors:*

hyan@ust.hk (H. Y.); 6614034@glut.edu.cn (L. L.); yingpingzou@csu.edu.cn (Y. Z.)

## 1. General Measurement and Characterization

$^1\text{H}$  NMR and  $^{13}\text{C}$  NMR spectra of intermediates and target small molecule were recorded on a Bruker ADANCE 400 and 75 MHz NMR spectrometer using  $d$ -chloroform as solvent at room temperature. Chemical shift  $\text{CHCl}_3$  ( $\delta = 7.26$  ppm for  $^1\text{H}$  NMR and  $\delta = 77.0$  ppm for  $^{13}\text{C}$  NMR). UV-Vis spectra were measured using a Shimadzu UV-2600 recording spectrophotometer. Cyclic voltammogram (CV) measurements of NFAs thin films were conducted on a CHI660E electrochemical workstation using glassy carbon as the working electrode, Pt wire as the counter electrode, and Ag/AgCl as the reference electrode in  $0.1 \text{ mol L}^{-1}$  tetrabutylammonium hexafluorophosphate ( $\text{Bu}_4\text{NPF}_6$ ) acetonitrile solutions and at a scan rate of  $20 \text{ mV s}^{-1}$ .

## 2. Experimental procedures

Compound **1** and compound **2** were synthesized according to the previous reported methods.<sup>1, 2</sup> The bis(triphenylphosphine)palladium(II) dichloride [ $\text{Pd}(\text{PPh}_3)_2\text{Cl}_2$ ], triphenylphosphine ( $\text{PPh}_3$ ),  $N$ -methyl pyrrolidone (NMP), 5-(bromomethyl)undecane, bromide, 1,1-dicyanomethylene-3-indanone, phosphorus oxychloride, anhydrous 1,2-dichloroethane, tributyl(1,3-dioxolan-2-ylmethyl)phosphonium pyridine and reagents were purchased from J&K and Alfa Asia Chemical Co. Tetrahydrofuran (THF) was further dried by using sodium under  $110^\circ\text{C}$  refluxing condition.

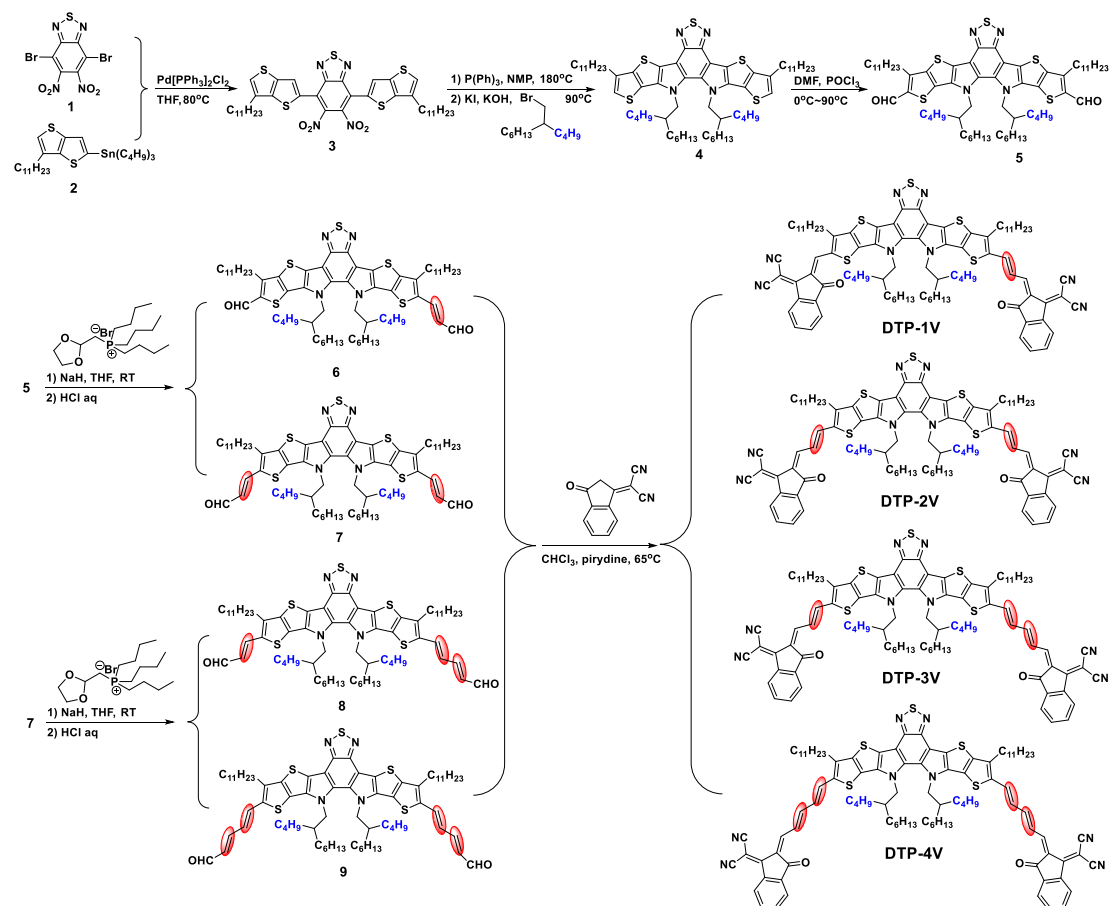

**Scheme S1.** Synthesis of four Y6 congeners.

Compound **4** was synthesized according to the literatures with some modification. Synthesized of compound **6** and **8** by Wittig reaction, but the symmetric and unsymmetrical products were got at same time, where the yield of the unsymmetrical desired target small molecule was not high.

### Synthesis of 5,6-dinitro-4,7-bis(6-undecylthieno[3,2-b]thiophen-2-yl)benzo[c][1,2,5]thiadiazole (**3**)

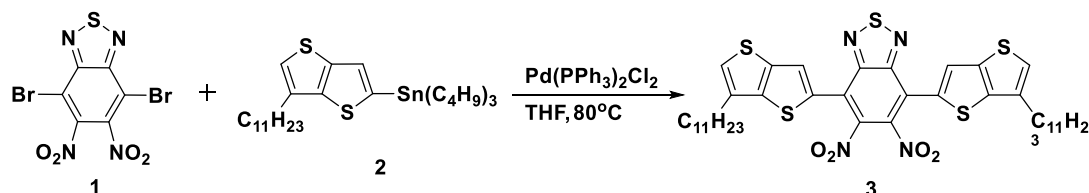

Compound **1** (4.0 g, 10 mmol), compound **2** (15.2 g, 26 mmol), and  $\text{Pd}(\text{PPh}_3)_2\text{Cl}_2$  (366 mg, 0.52 mmol) were dissolved in anhydrous THF (60 mL) and stirred at  $80^\circ\text{C}$  for 6 h under nitrogen atmosphere. The reaction mixture was allowed to cool to room

temperature and then concentrated under vacuum. A red solid Compound **3** was obtained by recrystallization with petroleum ether (100 mL) (6.7 g, 79% yield).  $^1\text{H}$  NMR (400 MHz,  $\text{CDCl}_3$ )  $\delta$  7.71 (s, 2H), 7.18 (s, 2H), 2.78 (t,  $J = 7.5$  Hz, 4H), 1.78 (dd,  $J = 14.5, 7.3$  Hz, 4H), 1.35-1.22 (m, 32H), 0.87 (t,  $J = 6.3$  Hz, 6H).

**Synthesis of 12,13-bis(2-butyloctyl)-3,9-diundecyl-12,13-dihydro-[1,2,5]thiadiazolo[3,4-e]thieno[2'',3'':4',5']thieno[2',3':4,5]pyrrolo[3,2-g]thieno[2',3':4,5]thieno[3,2-b]indole (4)**

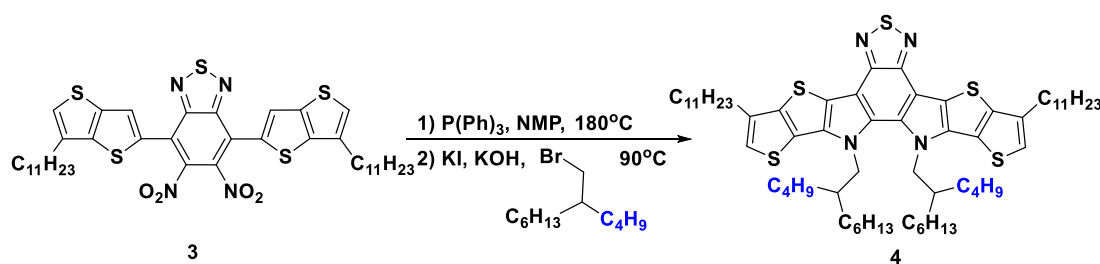

Compound **3** (2.5 g, 3 mmol) and  $\text{PPh}_3$  (8.0 g, 30 mmol) were dissolved in the anhydrous N-methyl pyrrolidone (NMP, 40 mL) under nitrogen atmosphere. The mixture was stirred at  $180^\circ\text{C}$  for 24 h. After cooled to room temperature, 5-(bromomethyl)undecane (3.8 g, 15 mmol), potassium iodide (0.511 g, 3 mmol), potassium hydroxide (1.73 g, 31 mmol), and NMP (40 mL) were added. The mixture was stirred at  $90^\circ\text{C}$  for 24 h under nitrogen atmosphere. After cooled to room temperature, the mixture was then poured into water (300 mL). The organic solution was extracted with  $\text{CH}_2\text{Cl}_2$ . The combined organic layers were washed with water, brine and dried with anhydrous  $\text{MgSO}_4$ . The bright orange solid compound **4** was obtained by column chromatography on silica gel using petroleum ether/dichloromethane (9/1, v/v) as the eluent (1.3 g, 40% yield).  $^1\text{H}$  NMR (400 MHz,  $\text{CDCl}_3$ ) 7.01 (s, 2H), 4.59 (d,  $J = 7.7$  Hz, 4H), 2.82 (t,  $J = 7.6$  Hz, 4H), 2.15-1.96 (m, 2H), 1.90-1.81 (m, 4H), 1.42-1.25 (m, 40H), 0.97-0.84 (m, 24H), 0.77-0.50 (m, 18H).  $^{13}\text{C}$  NMR (101 MHz,  $\text{CDCl}_3$ )  $\delta$  147.76, 142.18, 136.92, 131.80, 123.77, 122.88, 119.36, 111.59, 108.44, 55.07, 38.74, 36.22, 35.90, 32.00, 31.69 30.30, 29.60, 28.96, 28.14, 27.92, 25.42, 25.28, 23.03, 22.46, 14.36, 13.69.

**Synthesis of 12,13-bis(2-butyloctyl)-3,9-diundecyl-12,13-dihydro-[1,2,5]thiadiazolo[3,4-e]thieno[2'',3'':4',5']thieno[2',3':4,5]pyrrolo[3,2-g]thieno[2',3':4,5]thieno[3,2-b]indole-2,10-dicarbaldehyde (5)**

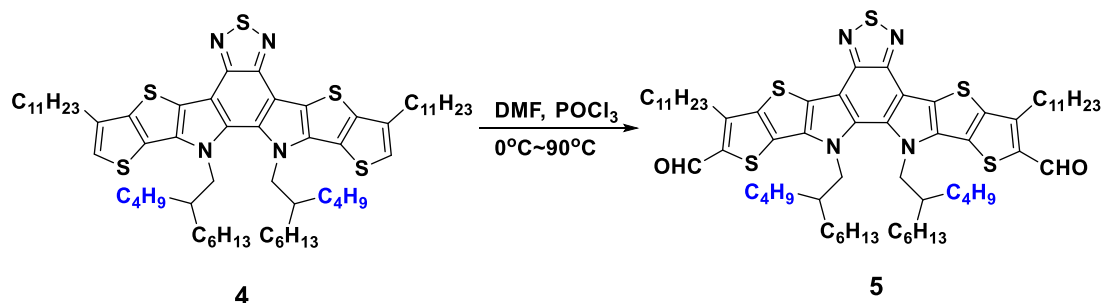

Phosphorus oxychloride (7.7 g, 50 mmol) was added dropwise slowly to anhydrous DMF (60 mL) at 0°C under nitrogen atmosphere and the mixture was then stirred for 2 h. A solution of compound **4** (1.8 g, 1.87 mmol) in anhydrous 1,2-dichloroethane (60 mL) was added dropwise to the mixture. After stirring at the same temperature for another 1.5 h, the mixture was heated to 90°C for 10 h. The reaction mixture was poured into water (150 mL) to quench the reaction, neutralized by NaOH and then extracted with CH<sub>2</sub>Cl<sub>2</sub>. The combined organic layers were washed with water and brine, dried over MgSO<sub>4</sub>. Removing the solvent under reduced pressure and the crude product was purified with column chromatography on a silica gel using petroleum ether/dichloromethane (1/1, v/v) as the eluent to give a deep orange solid **5** (1.62 g, 85% yield). <sup>1</sup>H NMR (400 MHz, CDCl<sub>3</sub>) δ 10.14 (s, 2H), 4.62 (d, *J* = 7.7 Hz, 4H), 3.20 (t, *J* = 7.6 Hz, 4H), 2.06-2.00 (m, 2H), 1.96-1.88 (m, 4H), 1.52-1.20 (m, 40H), 0.98-0.84 (m, 24H), 0.76-0.53 (m, 18H). <sup>13</sup>C NMR (101 MHz, CDCl<sub>3</sub>) δ 181.82, 147.49, 146.89, 143.17, 137.03, 136.81, 132.97, 129.67, 127.40, 112.39, 55.23, 38.86, 31.91, 31.51, 30.50, 29.90, 29.84, 28.97, 28.17, 27.82, 25.20, 22.71, 22.43, 14.04, 13.70.

**Synthesis of (E)-12,13-bis(2-butyloctyl)-10-(3-oxoprop-1-en-1-yl)-3,9-diundecyl-12,13-dihydro-[1,2,5]thiadiazolo[3,4-e]thieno[2'',3'':4',5']thieno[2',3':4,5]pyrrolo[3,2-g]thieno[2',3':4,5]thieno[3,2-b]indole-2-carbaldehyde (6)**

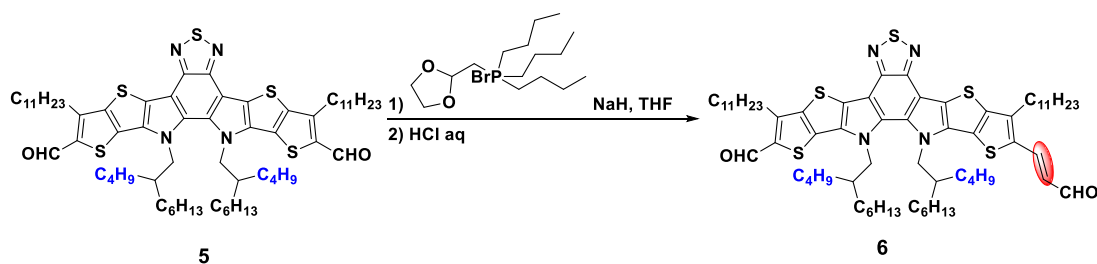

To a solution of the mixture of compound **5** (560 mg, 0.5 mmol) and tributyl(1,3-dioxolan-2-ylmethyl)phosphonium bromide (180 mg, 0.5 mmol) in anhydrous THF (30 mL) was added sodium hydride (60% wt%, 24 mg, 0.5 mmol) under nitrogen atmosphere, and the resulting solution was stirred at room temperature for 10 h. The reaction mixture was added HCl solution (10%, 10 mL) to quench the reaction and stirred at room temperature for 4-5 h. Then the mixture was extracted with CH<sub>2</sub>Cl<sub>2</sub>. The combined organic layers were washed with water and brine, dried over MgSO<sub>4</sub>. Removing the solvent under reduced pressure and the crude product was purified with column chromatography on a silica gel using petroleum ether/dichloromethane (1/1, v/v) as the eluent to give a red solid **6** (108 mg, 34% yield). <sup>1</sup>H NMR (400 MHz, CDCl<sub>3</sub>) δ 10.14 (s, 1H), 9.71 (d, *J* = 7.6 Hz, 1H), 7.78 (d, *J* = 15.3 Hz, 1H), 6.53 (dd, *J* = 15.8, 8.2 Hz, 1H), 4.61 (t, *J* = 7.7 Hz, 4H), 3.20 (t, *J* = 7.5 Hz, 2H), 2.99 (t, *J* = 7.5 Hz, 2H), 2.04 (s, 2H), 1.99-1.83 (m, 4H), 1.39-1.24 (m, 40H), 0.91-0.83 (m, 24H), 0.78-0.55 (m, 18H). <sup>13</sup>C NMR (101 MHz, CDCl<sub>3</sub>) δ 192.45, 181.67, 147.42, 147.39, 146.80, 143.82, 143.26, 142.97, 142.62, 141.98, 137.01, 136.85, 136.56, 133.35, 133.13, 132.38, 129.65, 127.45, 125.80, 125.29, 125.06, 112.49, 111.99, 55.14, 38.91, 38.80, 38.68, 34.47, 34.06, 31.84, 31.47, 30.29, 30.11, 30.02, 29.95, 29.82, 29.62, 29.59, 29.57, 29.55, 29.45, 29.37, 29.32, 29.27, 28.29, 28.09, 28.00, 27.89, 27.83, 27.73, 27.66, 25.21, 25.13, 24.97, 24.93, 22.90, 22.62, 22.39, 22.37, 20.10, 19.10, 14.35, 14.10, 14.05, 13.89, 13.68, 13.65, 13.64, 13.62, 11.34. (MALDI-TOF) *m/z* calcd. for (C<sub>94</sub>H<sub>110</sub>N<sub>8</sub>O<sub>2</sub>S<sub>5</sub>): 1164.6450. Found: 1164.6444.

**Synthesis of (2E,2'E)-3,3'-(12,13-bis(2-butyloctyl)-3,9-diundecyl-12,13-dihydro-[1,2,5]thiadiazolo[3,4-e]thieno[2'',3'':4',5']thieno[2',3':4,5]pyrrolo[3,2-g]thieno[2',3':4,5]thieno[3,2-b]indole-2,10-diyl)diacrylaldehyde (7)**

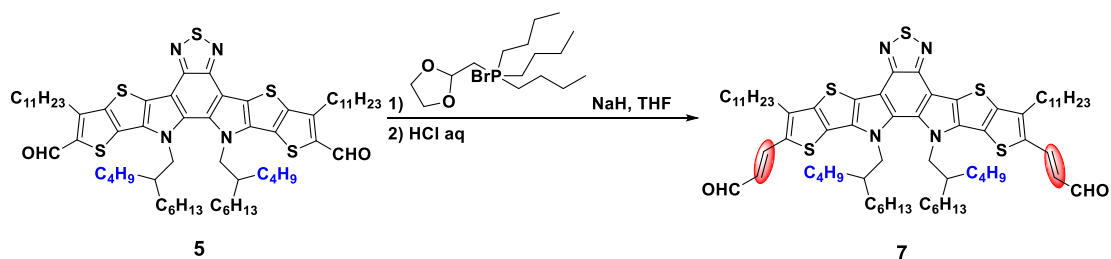

The synthesis of compound **7** was followed the same procedure of compound **6**. To a solution of the mixture of compound **5** (1.0 g, 0.87 mmol) and tributyl(1,3-dioxolan-2-ylmethyl)phosphonium bromide (713 mg, 1.93 mmol) in anhydrous THF (50 mL) was added sodium hydride (60% wt%, 105 mg, 2.63 mmol) under nitrogen atmosphere, and the resulting solution was stirred at room temperature for 10 h. The reaction mixture was added HCl solution (10%, 10 mL) to quench the reaction and stirred at room temperature for 4-5 h. Then the mixture was extracted with CH<sub>2</sub>Cl<sub>2</sub>. The combined organic layers were washed with water and brine, dried over MgSO<sub>4</sub>. Removing the solvent under reduced pressure and the crude product was purified with column chromatography on a silica gel using petroleum ether/dichloromethane (1/1, v/v) as the eluent to give a bright red solid compound **7** (930 mg, 89% yield). <sup>1</sup>H NMR (400 MHz, CDCl<sub>3</sub>) δ 9.70 (d, *J* = 7.6 Hz, 2H), 7.78 (d, *J* = 15.3 Hz, 2H), 6.52 (dd, *J* = 15.2, 7.6 Hz, 2H), 4.59 (d, *J* = 7.6 Hz, 4H), 2.99 (t, *J* = 7.5 Hz, 4H), 2.06-1.99 (m, 2H), 1.89-1.81 (m, 4H), 1.52-1.21 (m, 40H), 0.99-0.83 (m, 24H), 0.63 (m, 18H). <sup>13</sup>C NMR (101 MHz, CDCl<sub>3</sub>) δ 192.72, 147.59, 143.86, 142.89, 142.23, 137.00, 133.41, 132.82, 126.12, 125.35, 125.32, 112.31, 55.25, 38.97, 32.04, 31.69, 30.45, 30.32, 30.17, 30.01, 28.83, 29.79, 29.74, 29.68, 29.57, 29.46, 28.49, 27.88, , 25.37, 25.13, 22.82, 22.59, 14.26, 14.09, 13.88, 13.84. (MALDI-TOF) *m/z* calcd. for (C<sub>94</sub>H<sub>110</sub>N<sub>8</sub>O<sub>2</sub>S<sub>5</sub>): 1190.6606. Found: 1190.6597.

**Synthesis of (2E,4E)-5-(12,13-bis(2-butyloctyl)-10-((E)-3-oxoprop-1-en-1-yl)-3,9-diundecyl-12,13-dihydro-[1,2,5]thiadiazolo[3,4-e]thieno[2'',3''':4',5']thieno[2',3':4,5]pyrrolo[3,2-g]thieno[2',3':4,5]thieno[3,2-b]indol-2-yl)penta-2,4-dienal (**8**)**

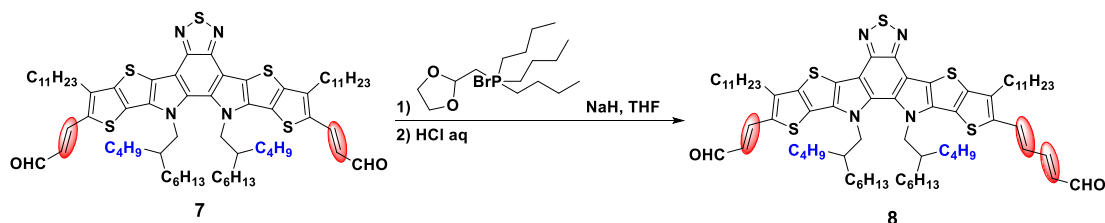

The synthesis of compound **8** was followed the same procedure of compound **6**. To a solution of the mixture of compound **7** (400 mg, 0.34 mmol) and tributyl(1,3-dioxolan-2-ylmethyl)phosphonium bromide (120 mg, 0.34 mmol) in anhydrous THF (30 mL) was added sodium hydride (60% wt%, 14 mg, 0.34 mmol) under nitrogen atmosphere, and the resulting solution was stirred at room temperature for 10 h. The reaction mixture was added HCl solution (10%, 10 mL) to quench the reaction and stirred at room temperature for 4-5 h. Then the mixture was extracted with CH<sub>2</sub>Cl<sub>2</sub>. The combined organic layers were washed with water and brine, dried over MgSO<sub>4</sub>. Removing the solvent under reduced pressure and the crude product was purified with column chromatography on a silica gel using petroleum ether/dichloromethane (1/1, v/v) as the eluent to give a deep red solid compound **8** (150 mg, 37% yield). <sup>1</sup>H NMR (400 MHz, CDCl<sub>3</sub>) δ 9.70 (d, *J* = 7.6 Hz, 1H), 9.63 (d, *J* = 7.9 Hz, 1H), 7.78 (d, *J* = 15.3 Hz, 1H), 7.32 (dt, *J* = 15.0, 5.5 Hz, 2H), 6.80 (dd, *J* = 14.7, 11.1 Hz, 1H), 6.52 (dd, *J* = 15.3, 7.6 Hz, 1H), 6.27 (dd, *J* = 15.0, 7.9 Hz, 1H), 4.59 (d, *J* = 7.2 Hz, 4H), 2.99 (t, *J* = 7.7 Hz, 2H), 2.92 (t, *J* = 7.6 Hz, 2H), 2.04 (s, 2H), 1.83 (dd, *J* = 13.6, 7.3 Hz, 4H), 1.50-1.21 (m, 34H), 1.13-0.84 (m, 30H), 0.82-0.48 (m, 18H). (MALDI-TOF) *m/z* calcd. for (C<sub>94</sub>H<sub>110</sub>N<sub>8</sub>O<sub>2</sub>S<sub>5</sub>): 1216.6763. Found: 1216.6759.

**Synthesis of (2E,2'E,4E,4'E)-5,5'-(12,13-bis(2-butyloctyl)-3,9-diundecyl-12,13-dihydro-[1,2,5]thiadiazolo[3,4-e]thieno[2'',3':4',5']thieno[2',3':4,5]pyrrolo[3,2-g]thieno[2',3':4,5]thieno[3,2-b]indole-2,10-diyl)bis(penta-2,4-dienal) (9)**

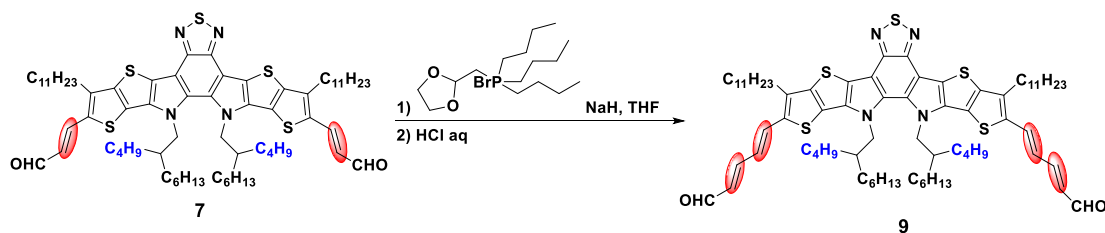

The synthesis of compound **9** was followed the same procedure of compound **6**. To a



solution of the mixture of compound **7** (134 mg, 0.11 mmol) and tributyl(1,3-dioxolan-2-ylmethyl)phosphonium bromide (91 mg, 0.25 mmol) in anhydrous THF (30 mL) was added sodium hydride (60% wt%, 13 mg, 0.33 mmol) under nitrogen atmosphere, and the resulting solution was stirred at room temperature for 10 h. The reaction mixture was added HCl solution (10%, 10 mL) to quench the reaction and stirred at room temperature for 4-5 h. Then the mixture was extracted with CH<sub>2</sub>Cl<sub>2</sub>. The combined organic layers were washed with water and brine, dried over MgSO<sub>4</sub>. Removing the solvent under reduced pressure and the crude product was purified with column chromatography on a silica gel using petroleum ether/dichloromethane (1/1, v/v) as the eluent to give a deep red solid compound **9** (130 mg, 92% yield). <sup>1</sup>H NMR (400 MHz, CDCl<sub>3</sub>) δ 9.63 (d, *J* = 7.9 Hz, 2H), 7.36-7.28 (m, 4H), 6.80 (dd, *J* = 14.8, 11.2 Hz, 2H), 6.27 (dd, *J* = 14.9, 7.8 Hz, 2H), 4.58 (d, *J* = 7.6 Hz, 4H), 2.92 (t, *J* = 7.6 Hz, 4H), 2.06 (s, 2H), 1.86-1.79 (m, 4H), 1.45-1.25 (m, 34H), 1.06-0.83 (m, 30H), 0.80-0.50 (m, 18H). (MALDI-TOF) *m/z* calcd. for (C<sub>94</sub>H<sub>110</sub>N<sub>8</sub>O<sub>2</sub>S<sub>5</sub>): 1242.6919. Found: 1242.6904.

**Synthesis of 2-(((Z)-2-((E)-3-(12,13-bis(2-butyloctyl)-10-(((Z)-1-(dicyanomethylene)-3-oxo-1,3-dihydro-2H-inden-2-ylidene)methyl)-3,9-diundecyl-12,13-dihydro-[1,2,5]thiadiazolo[3,4-e]thieno[2'',3'':4',5']thieno[2',3':4,5]pyrrolo[3,2-g]thieno[2',3':4,5]thieno[3,2-b]indol-2-yl)allylidene)-3-oxo-2,3-dihydro-1H-inden-1-ylidene)malononitrile (BTP-1V)**

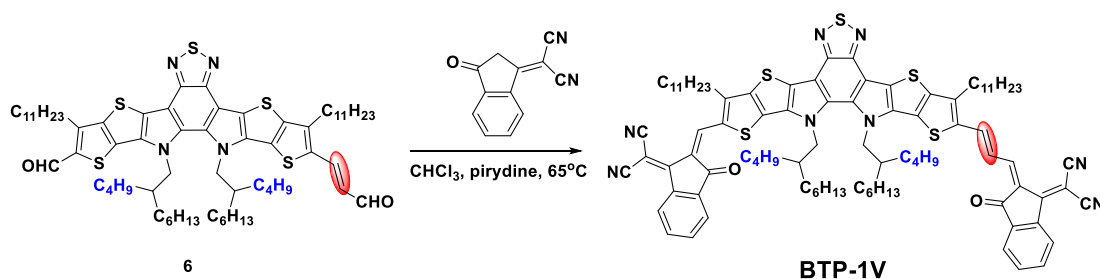

Compound **6** (100 mg, 0.09 mmol) and 1,1-dicyanomethylene-3-indanone (67 mg, 0.32 mmol) were dissolved in chloroform (30 mL). Then pyridine (1.0 mL) was slowly added dropwise under nitrogen atmosphere. The mixture was stirred at 65°C overnight. After cooling to room temperature, the mixture was poured into methanol

(200 mL) and filtered. The residue was purified with column chromatography on silica gel using petroleum ether/dichloromethane (1/2, v/v) as the eluent to give a dark blue solid **BTP-1V** (110 mg, 85% yield).  $^1\text{H NMR}$  (400 MHz,  $\text{CDCl}_3$ )  $\delta$  9.18 (s, 1H), 8.77-8.67 (m, 3H), 8.52 (d,  $J = 11.6$  Hz, 1H), 7.94 (dd,  $J = 10.2, 5.0$  Hz, 2H), 7.81-7.73 (m, 4H), 7.70 (d,  $J = 14.4$  Hz, 1H), 4.75 (s, 2H), 4.66 (d,  $J = 7.3$  Hz, 2H), 3.24 (t,  $J = 7.7$  Hz, 2H), 3.02 (t,  $J = 7.6$  Hz, 2H), 2.13 (s, 2H), 1.87 (dd,  $J = 15.0, 7.3$  Hz, 4H), 1.53-1.24 (m, 30H), 1.20-0.84 (m, 34H), 0.84-0.55 (m, 18H). (MALDI-TOF)  $m/z$  calcd. for ( $\text{C}_{92}\text{H}_{108}\text{N}_8\text{O}_2\text{S}_5$ ): 1517.7232. Found: 1517.7226.

**Synthesis of (12,13-bis(2-butyloctyl)-3,9-diundecyl-12,13-dihydro-[1,2,5]thiadiazolo[3,4-e]thieno[2'',3''':4',5']thieno[2',3':4,5]pyrrolo[3,2-g]thieno[2',3':4,5]thieno[3,2-b]indole-2,10-diy)bis(prop-2-en-3-yl-1-ylidene))bis(3-oxo-2,3-dihydro-1H-indene-2,1-diyidene)dimalononitrile (BTP-2V)**

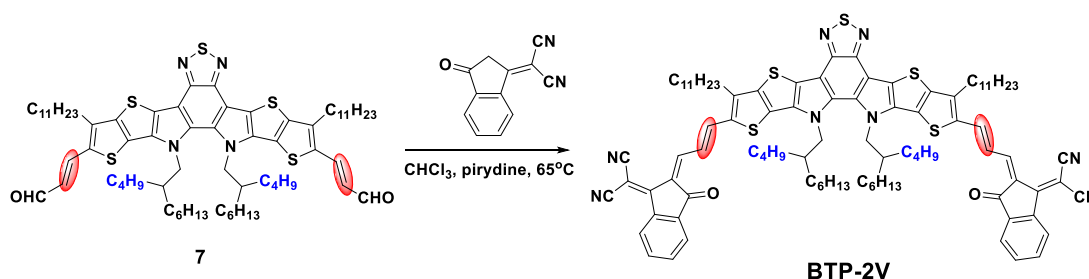

The synthesis of **BTP-2V** was followed the same procedure of **BTP-1V**. Compound **7** (150 mg, 0.13 mmol) and 1,1-dicyanomethylene-3-indanone (98 mg, 0.50 mmol) were dissolved in chloroform (30 mL). Then pyridine (1.0 mL) was slowly added dropwise under nitrogen atmosphere. The mixture was stirred at 65°C overnight. After cooling to room temperature, the mixture was poured into methanol (200 mL) and filtered. The residue was purified with column chromatography on silica gel using petroleum ether/dichloromethane (1/2, v/v) as the eluent to give a dark blue solid **BTP-2V** (150 mg, 80% yield).  $^1\text{H NMR}$  (400 MHz,  $\text{CDCl}_3$ )  $\delta$  8.71 (t,  $J = 11.3$  Hz, 4H), 8.52 (d,  $J = 11.6$  Hz, 2H), 7.92 (dd,  $J = 5.9, 2.2$  Hz, 2H), 7.80-7.67 (m, 6H), 4.65 (d,  $J = 6.6$  Hz, 4H), 3.02 (t,  $J = 7.5$  Hz, 4H), 2.12 (s, 2H), 1.93-1.81 (m, 4H), 1.52-1.22 (m, 36H), 1.07-0.84 (m, 28H), 0.83-0.56 (m, 18H). (MALDI-TOF)  $m/z$  calcd. for ( $\text{C}_{94}\text{H}_{110}\text{N}_8\text{O}_2\text{S}_5$ ): 1543.7389. Found: 1543.7380.

**Synthesis of 3-(12,13-bis(2-butyloctyl)-1-(dicyanomethylene)-3-oxo-1,3-dihydro-2H-inden-2-ylidene)penta-1,3-dien-1-yl)-3,9-diundecyl-12,13-dihydro-[1,2,5]thiadiazolo[3,4-e]thieno[2'',3'':4',5']thieno[2',3':4,5]pyrrolo[3,2-g]thieno[2',3':4,5]thieno[3,2-b]indol-2-yl)allylidene)-3-oxo-2,3-dihydro-1H-inden-1-ylidene)malononitrile (BTP-3V)**

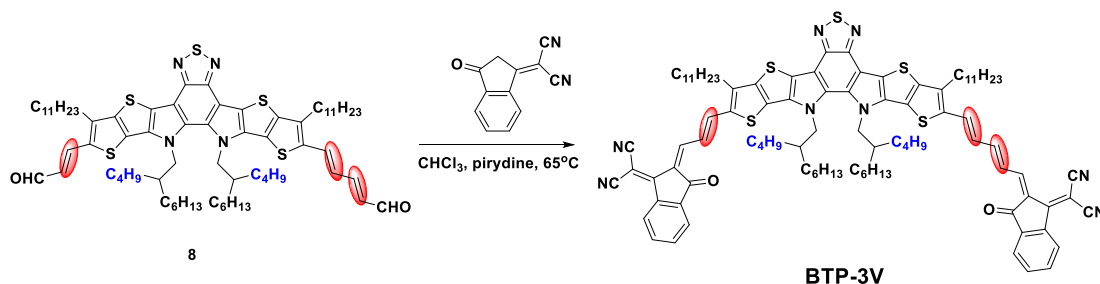

The synthesis of **BTP-3V** was followed the same procedure of **BTP-1V**. Compound **13** (80 mg, 0.06 mmol) and 1,1-dicyanomethylene-3-indanone (51 mg, 0.26 mmol) were dissolved in chloroform (20 mL). Then pyridine (1.0 mL) was slowly added dropwise under nitrogen atmosphere. The mixture was stirred at 65°C overnight. After cooling to room temperature, the mixture was poured into methanol (200 mL) and filtered. The residue was purified with column chromatography on silica gel using petroleum ether/dichloromethane (1/2, v/v) as the eluent to give a dark blue solid **BTP-3V-IC** (83 mg, 80% yield). <sup>1</sup>H NMR (400 MHz, CDCl<sub>3</sub>) δ 8.68 (t, *J* = 6.3 Hz, 3H), 8.52 (d, *J* = 11.7 Hz, 1H), 8.44 (d, *J* = 11.6 Hz, 1H), 8.32 (s, 1H), 7.91 (dd, *J* = 5.7, 1.7 Hz, 2H), 7.79-7.67 (m, 5H), 7.45-7.28 (m, 2H), 7.00 (s, 1H), 4.64 (d, *J* = 6.7 Hz, 4H), 3.01 (t, *J* = 7.3 Hz, 2H), 2.93 (t, *J* = 7.4 Hz, 2H), 2.11 (s, 1H), 1.90-1.78 (m, 4H), 1.49-1.23 (m, 34H), 1.10-0.84 (m, 30H), 0.83-0.48 (m, 18H). (MALDI-TOF) *m/z* calcd. for (C<sub>96</sub>H<sub>112</sub>N<sub>8</sub>O<sub>2</sub>S<sub>5</sub>): 1569.7545. Found: 1569.7528.

**Synthesis of (12,13-bis(2-butyloctyl)-3,9-diundecyl-12,13-dihydro-[1,2,5]thiadiazolo[3,4-e]thieno[2'',3'':4',5']thieno[2',3':4,5]pyrrolo[3,2-g]thieno[2',3':4,5]thieno[3,2-b]indole-2,10-diyl)bis(penta-2,4-dien-5-yl-1-ylidene))bis(3-oxo-2,3-dihydro-1H-indene-2,1-diylidene))dimalononitrile (BTP-4V)**

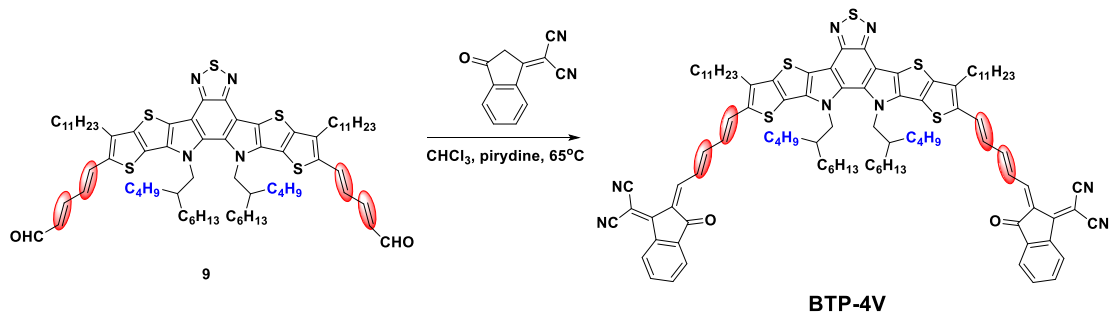

The synthesis of **BTP-4V** was followed the same procedure of **BTP-1V**. Compound **9** (130 mg, 0.1 mmol) and 1,1-dicyanomethylene-3-indanone (81 mg, 0.4 mmol) were dissolved in chloroform (40 mL). Then pyridine (1.0 mL) was slowly added dropwise under nitrogen atmosphere. The mixture was stirred at 65°C overnight. After cooling to room temperature, the mixture was poured into methanol (300 mL) and filtered. The residue was purified with column chromatography on silica gel using petroleum ether/dichloromethane (1/2, v/v) as the eluent to give a dark blue solid **BTP-4V** (135 mg, 82% yield). <sup>1</sup>H NMR (400 MHz, CDCl<sub>3</sub>) δ 8.66 (d, *J* = 7.2 Hz, 2H), 8.43 (d, *J* = 11.8 Hz, 2H), 8.30 (s, 2H), 7.90 (d, *J* = 6.3 Hz, 2H), 7.78-7.69 (m, 4H), 7.46-7.28 (m, 4H), 6.97 (s, 2H), 4.64 (d, *J* = 7.3 Hz, 4H), 2.93 (t, *J* = 7.3 Hz, 4H), 2.11 (s, 2H), 1.88-1.77 (m, 4H), 1.50-1.22 (m, 34H), 1.09-0.85 (m, 30H), 0.83-0.54 (m, 18H). (MALDI-TOF) *m/z* calcd. for (C<sub>98</sub>H<sub>114</sub>N<sub>8</sub>O<sub>2</sub>S<sub>5</sub>): 1595.7702. Found: 1595.7693.

### 3. $^1\text{H}$ and $^{13}\text{C}$ NMR spectra

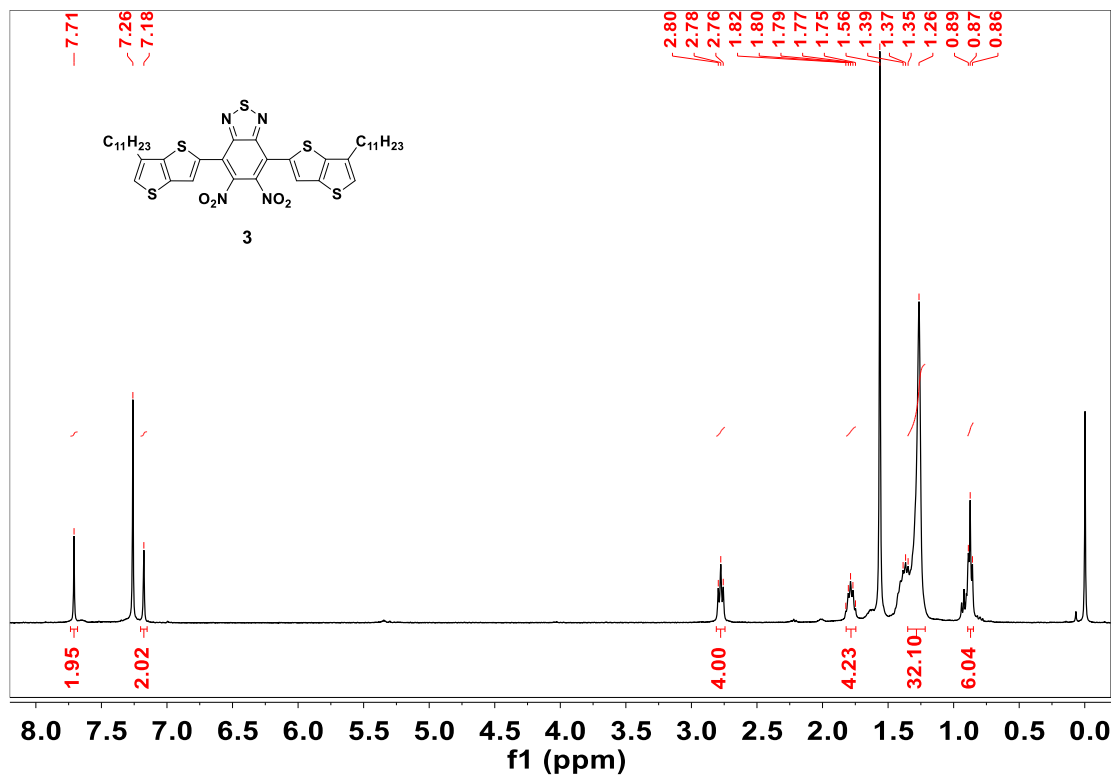

Fig. S1.  $^1\text{H}$  NMR spectrum of compound 3 in  $\text{CDCl}_3$

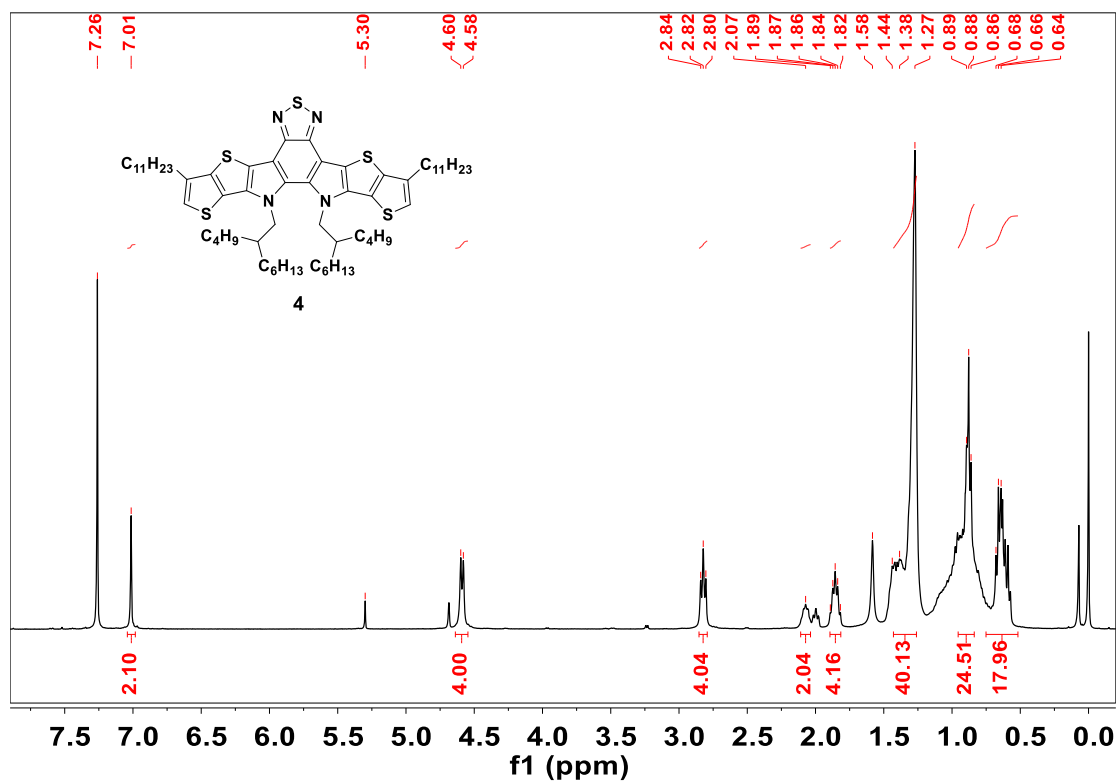

Fig. S2.  $^1\text{H}$  NMR spectrum of compound 4 in  $\text{CDCl}_3$

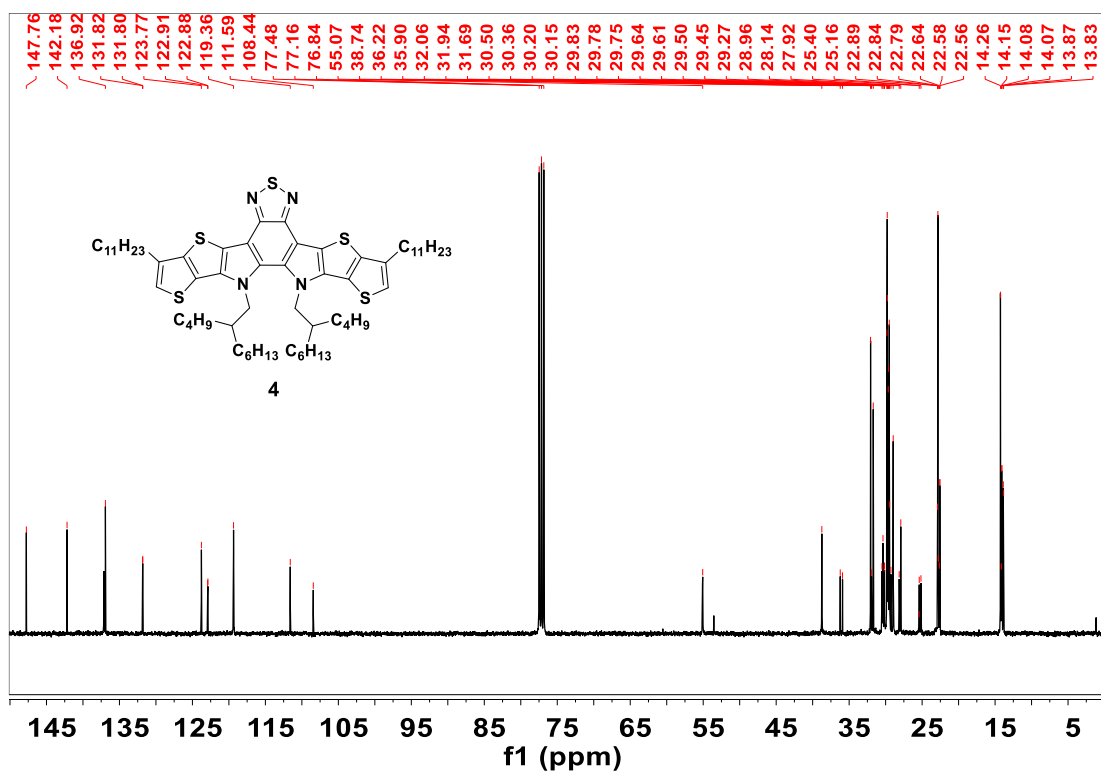

Fig. S3. <sup>13</sup>C NMR spectrum of compound 4 in CDCl<sub>3</sub>

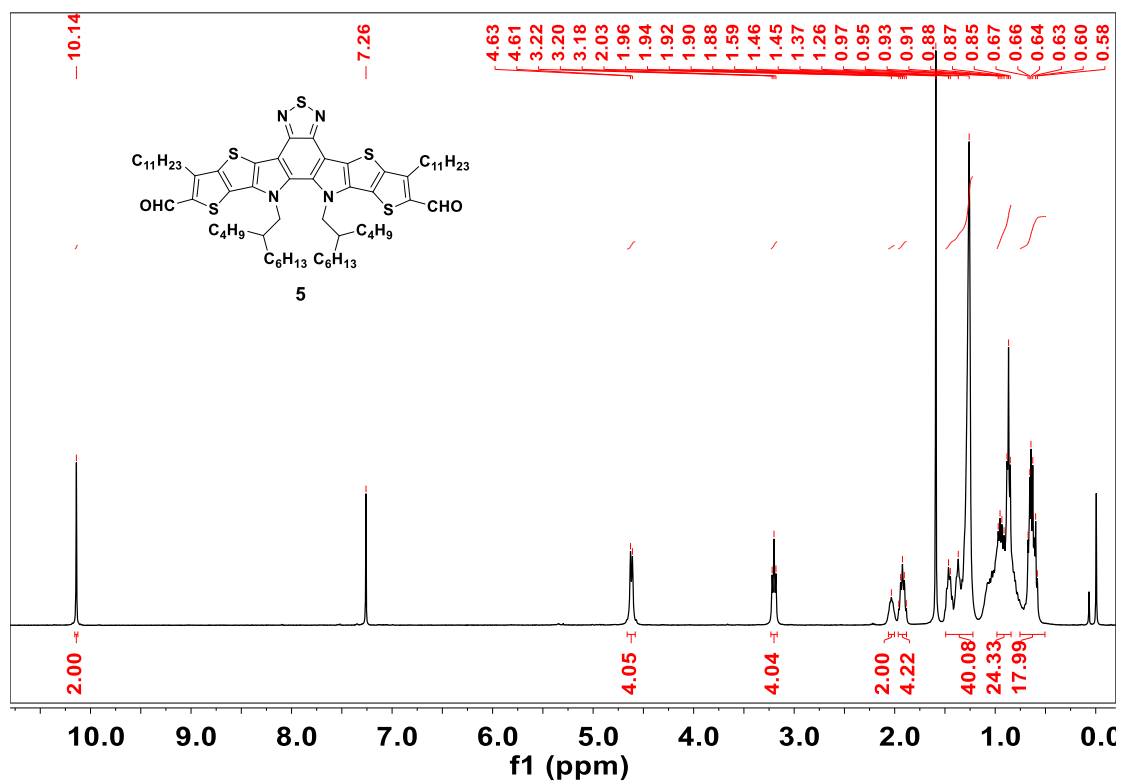

Fig. S4. <sup>1</sup>H NMR spectrum of compound 5 in CDCl<sub>3</sub>

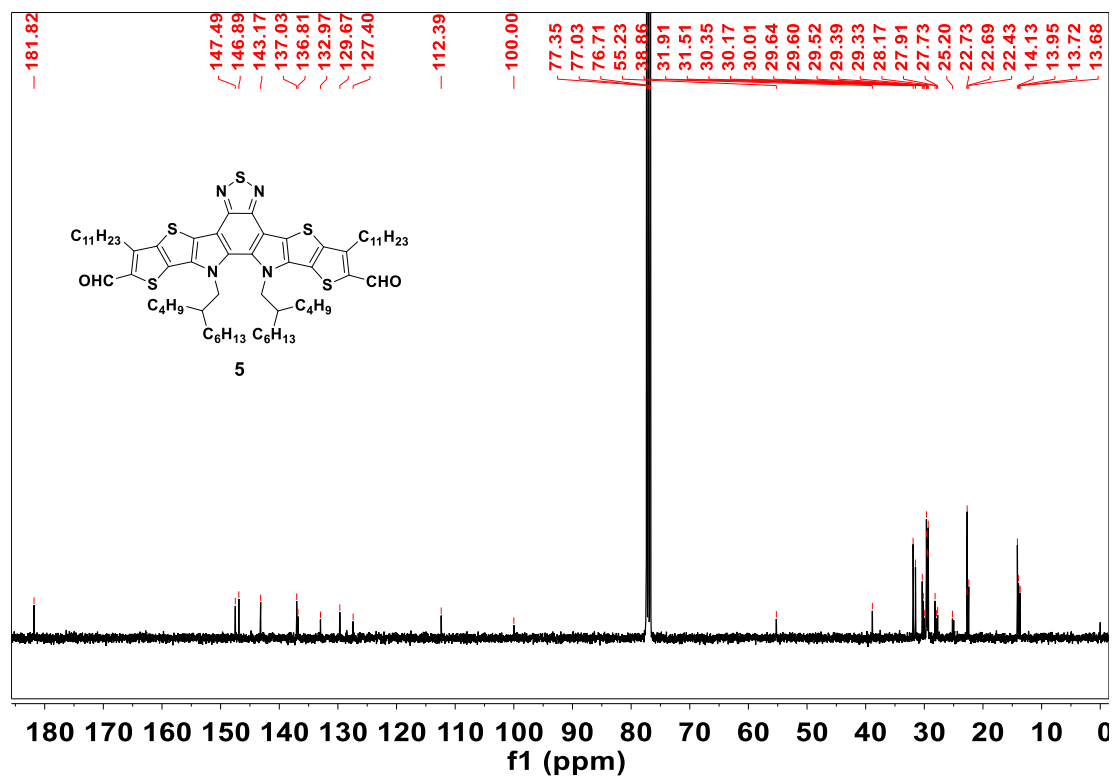

Fig. S5.  $^{13}\text{C}$  NMR spectrum of compound 5 in  $\text{CDCl}_3$

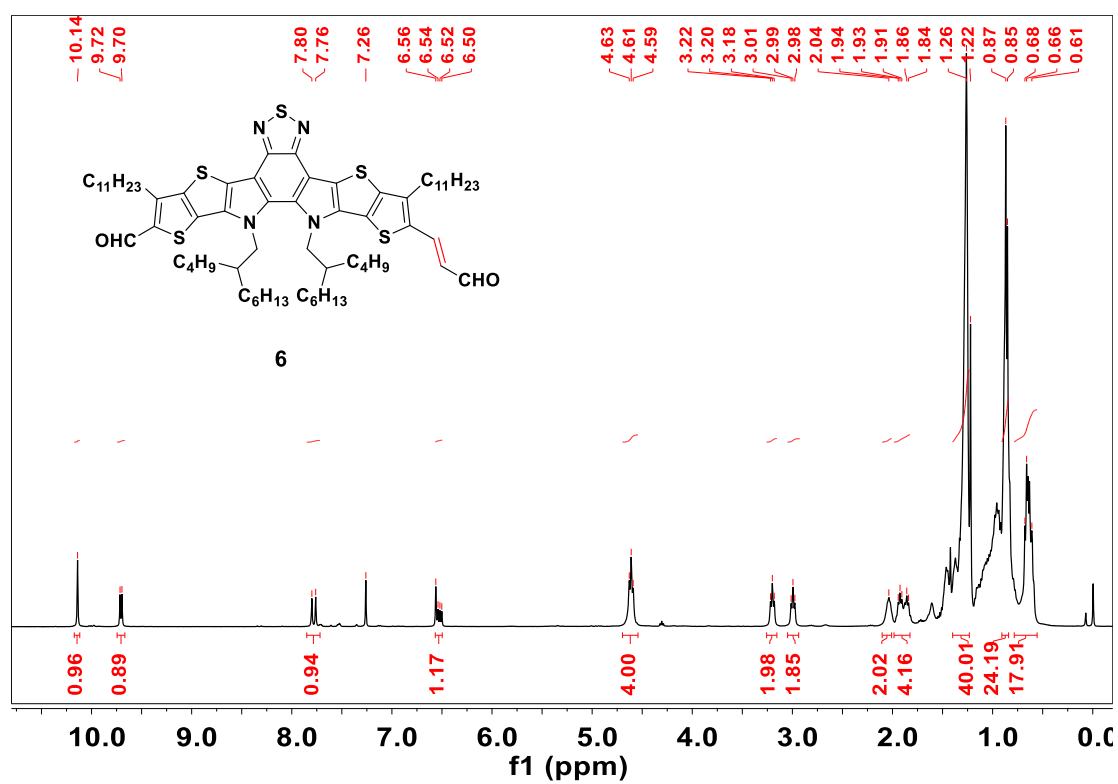

Fig. S6.  $^1\text{H}$  NMR spectrum of compound 6 in  $\text{CDCl}_3$

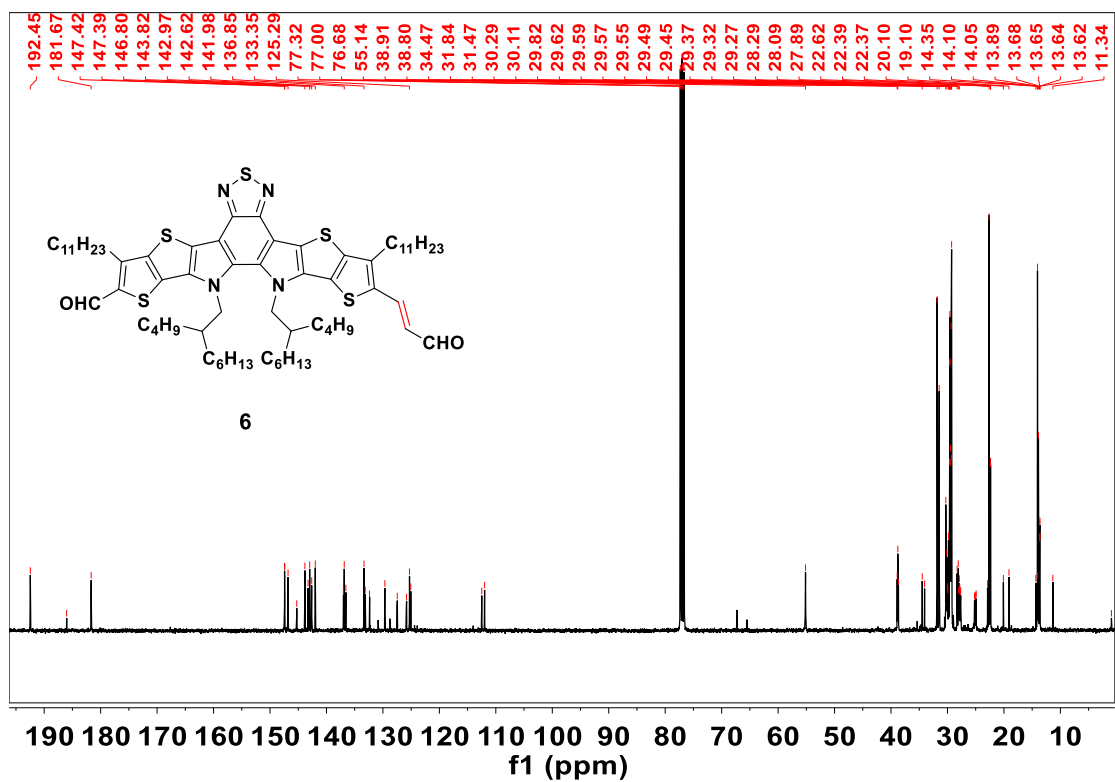

Fig. S7. <sup>13</sup>C NMR spectrum of compound 6 in CDCl<sub>3</sub>

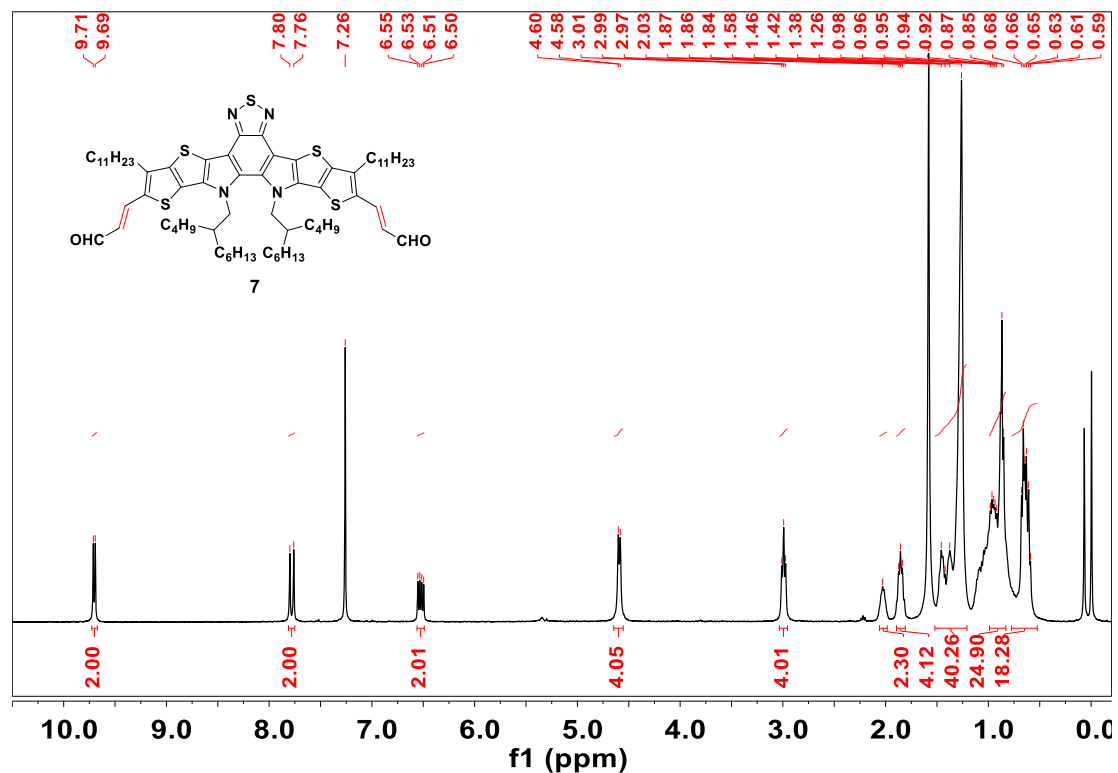

Fig. S8. <sup>1</sup>H NMR spectrum of compound 7 in CDCl<sub>3</sub>



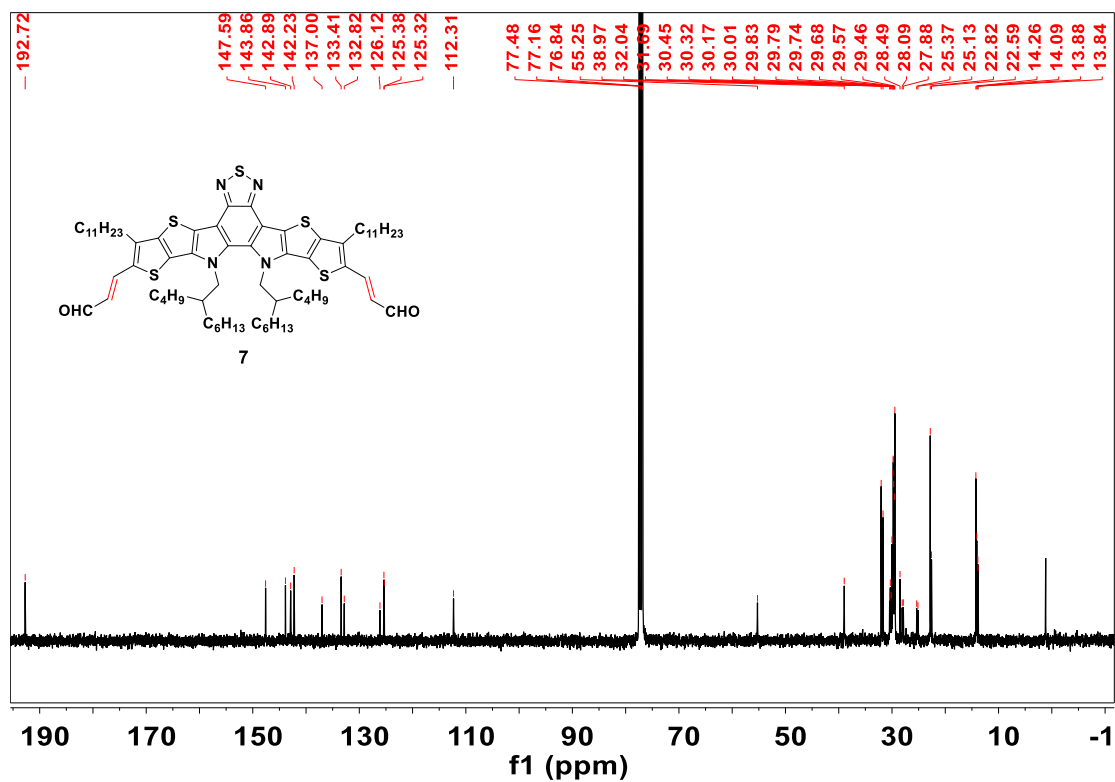

**Fig. S9.** <sup>13</sup>C NMR spectrum of compound 7 in CDCl<sub>3</sub>

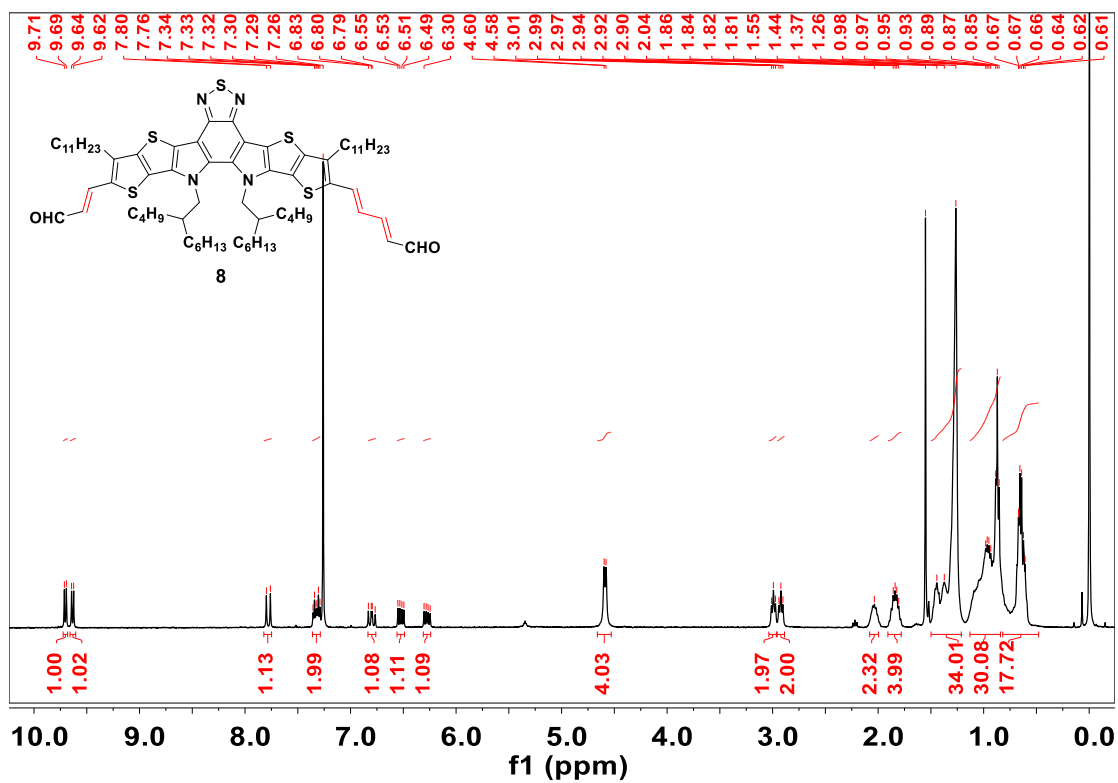

**Fig. S10.** <sup>1</sup>H NMR spectrum of compound 8 in CDCl<sub>3</sub>

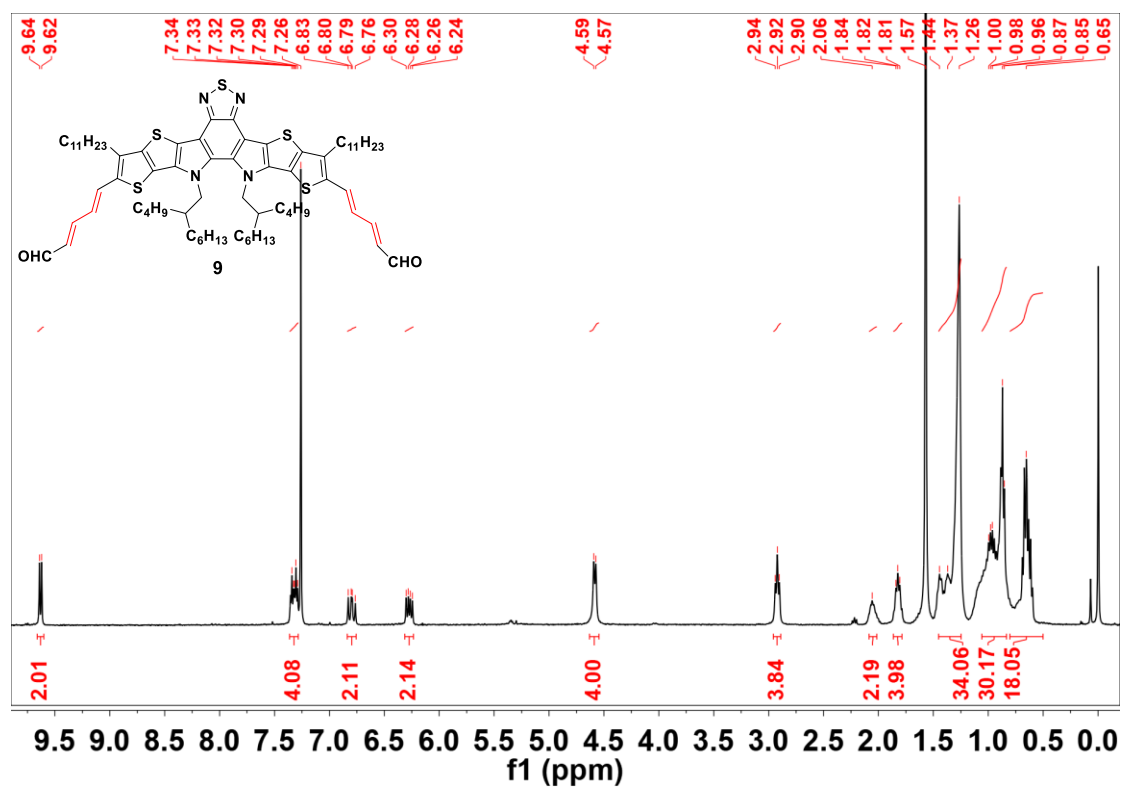

Fig. S11. <sup>1</sup>H NMR spectrum of 9 in CDCl<sub>3</sub>

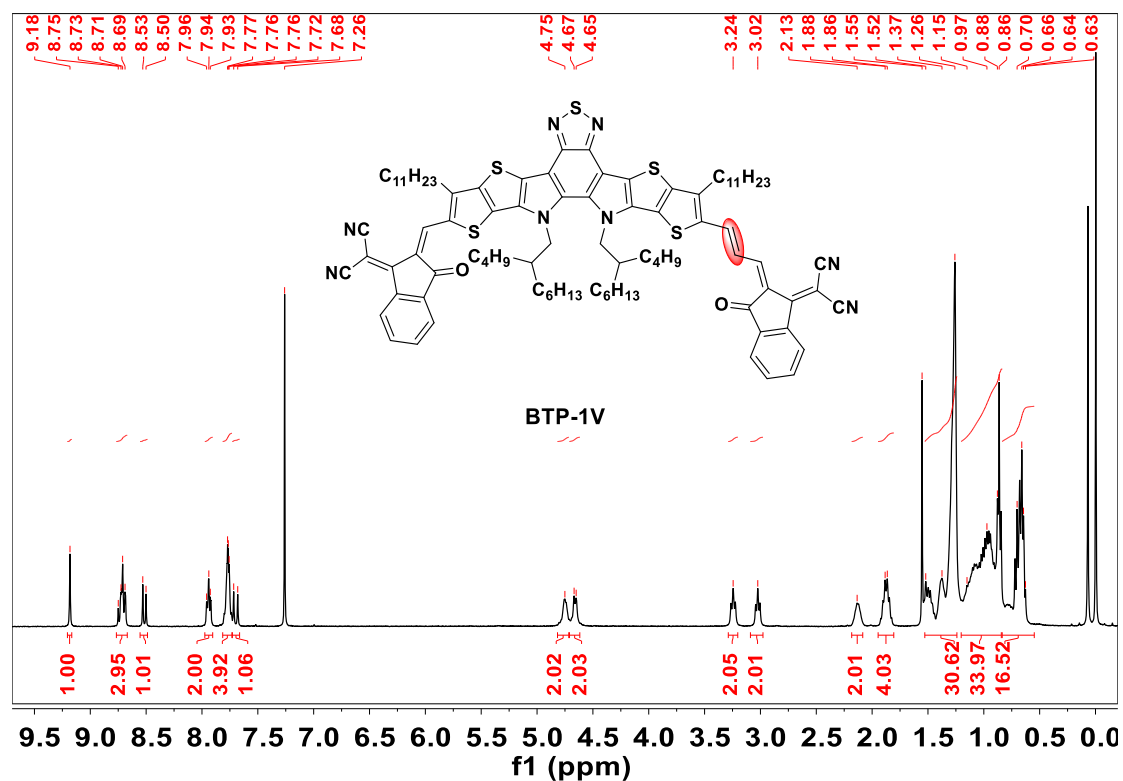

Fig. S12. <sup>1</sup>H NMR spectrum of compound BTP-1V in CDCl<sub>3</sub>

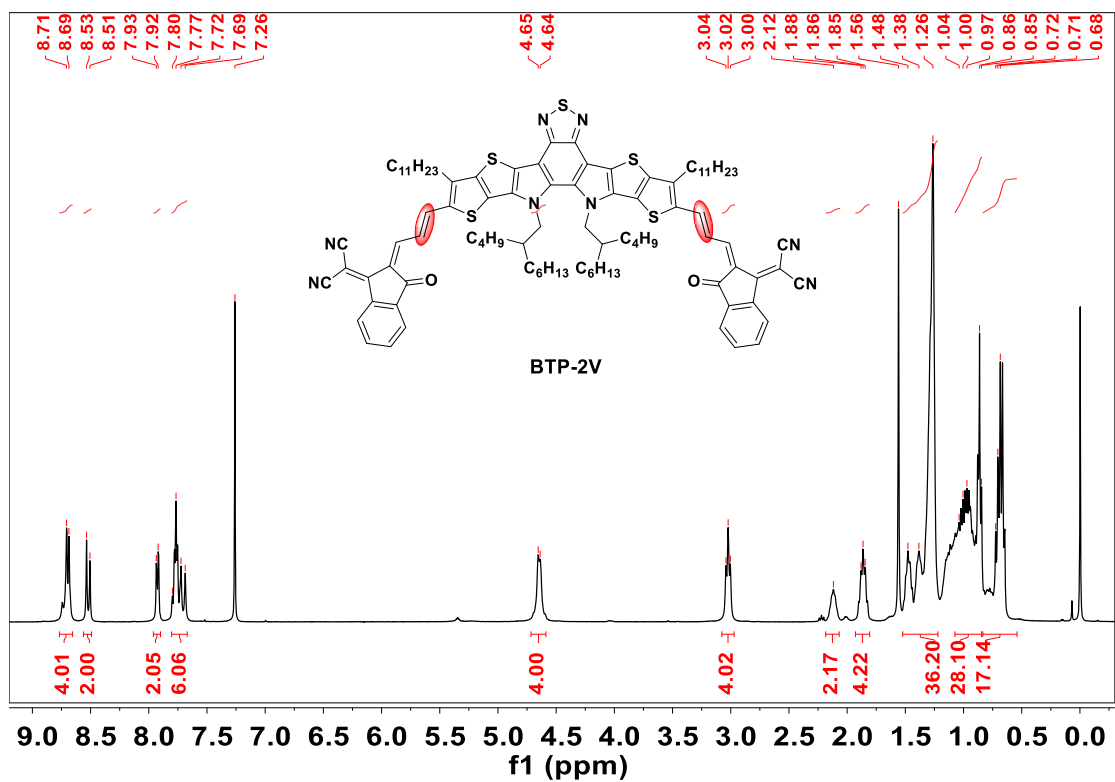

Fig. S13 <sup>1</sup>H NMR spectrum of compound BTP-2V in CDCl<sub>3</sub>

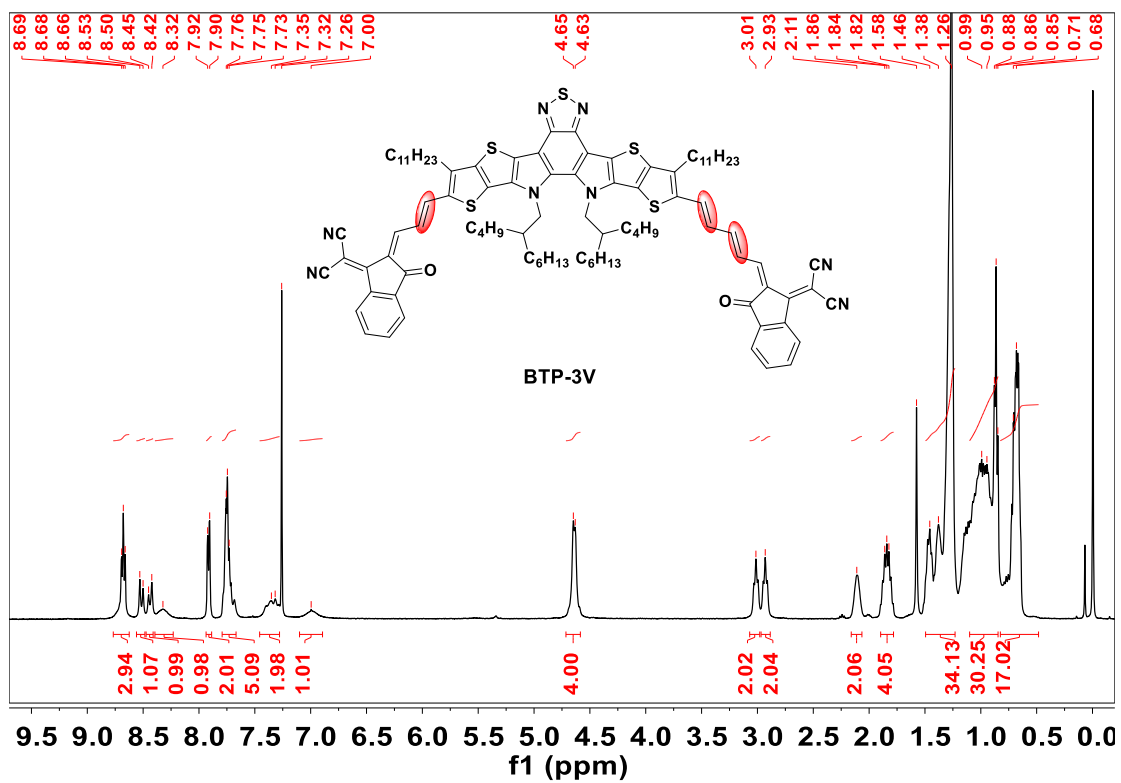

Fig. S14. <sup>1</sup>H NMR spectrum of BTP-3V in CDCl<sub>3</sub>

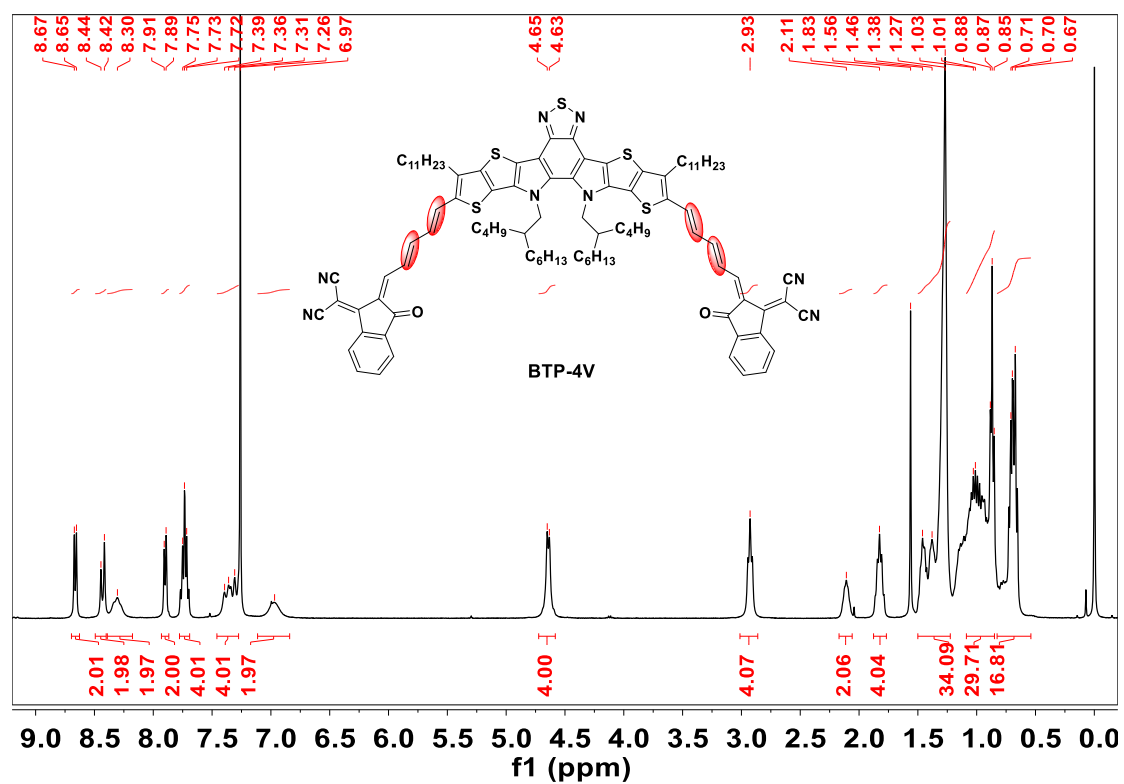

**Fig. S15.** <sup>1</sup>H NMR spectrum of BTP-4V in CDCl<sub>3</sub>

## 4. High resolution mass spectra

### MALDI, V1

| Analysis Info         |                                        | Acquisition Date      |                          |
|-----------------------|----------------------------------------|-----------------------|--------------------------|
| Analysis Name         | D:\Data\MALDI\20200107\1_0_H2_000003.d | Acquisition Date      | 1/7/2020 5:10:18 PM      |
| Method                | MALDI_P_100-3000                       | Operator              |                          |
| Sample Name           | MURU-N-ESI                             | Instrument            | solarix                  |
| Comment               |                                        |                       |                          |
| Acquisition Parameter |                                        |                       |                          |
| Acquisition Mode      | Single MS                              | Acquired Scans        | 2                        |
| Polarity              | Positive                               | No. of Cell Fills     | 1                        |
| Broadband Low Mass    | 202.1 m/z                              | No. of Laser Shots    | 10                       |
| Broadband High Mass   | 2400.0 m/z                             | Laser Power           | 16.8 lp                  |
| Source Accumulation   | 0.001 sec                              | Laser Shot Frequency  | 0.020 sec                |
| Ion Accumulation Time | 0.300 sec                              | Calibration Date      | Tue Jan 7 05:09:25 2020  |
|                       |                                        | Data Acquisition Size | 2097152                  |
|                       |                                        | Data Processing Size  | 4194304                  |
|                       |                                        | Apodization           | Sine-Bell Multiplication |

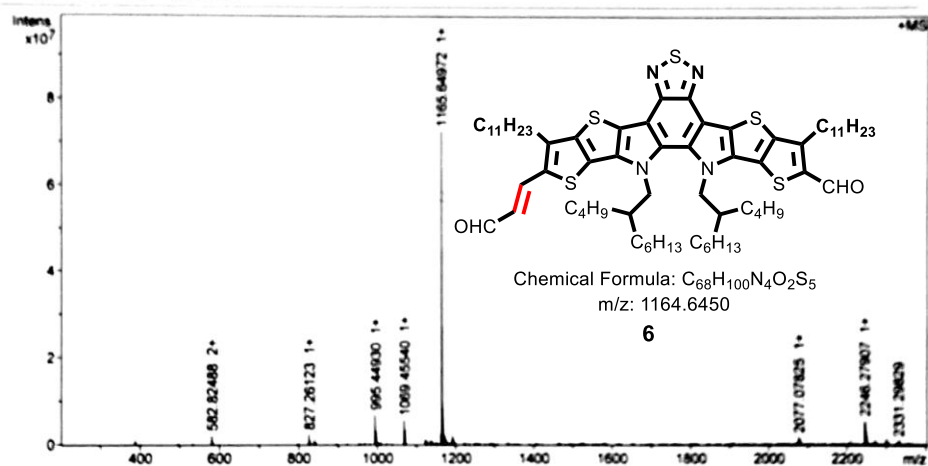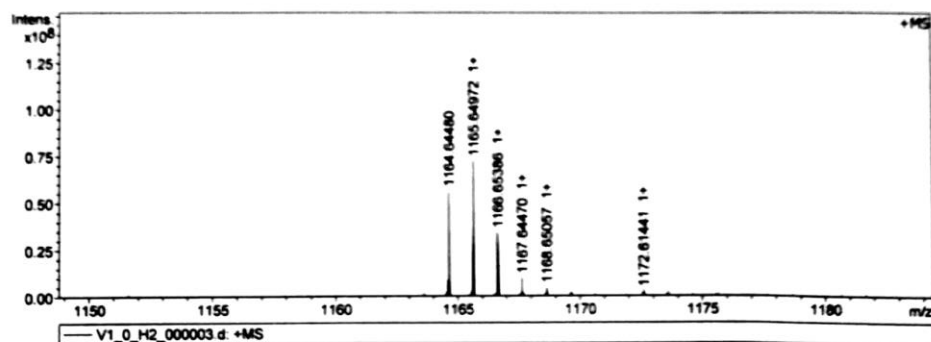

| Mass. $m/z$ | # | Ion Formula              | Score  | $m/z$       | err [ppm] | Mean err [ppm] | mSigma | rdB  | e <sup>-</sup> Conf | N-Rule |
|-------------|---|--------------------------|--------|-------------|-----------|----------------|--------|------|---------------------|--------|
| 1164.644799 | 1 | $C_{68}H_{100}N_4O_2S_5$ | 100.00 | 1164.644435 | -0.3      | -1.1           | 241.3  | 21.0 | odd                 | ok     |

Fig. S16. The MALDI-TOF of compound 6

# MALDI, V2

## Analysis Info

Analysis Name D:\Data\MALDI\2020\0107\V2\_0\_H3\_000002.d  
 Method MALDI\_P\_100-3000  
 Sample Name MURU-N-ESI  
 Comment

Acquisition Date 1/7/2020 5:11:59 PM

Operator  
 Instrument solarIX

## Acquisition Parameter

|                       |            |                      |           |                       |                          |
|-----------------------|------------|----------------------|-----------|-----------------------|--------------------------|
| Acquisition Mode      | Single MS  | Acquired Scans       | 4         | Calibration Date      | Tue Jan 7 05:09:25 2020  |
| Polarity              | Positive   | No. of Cell Fills    | 1         | Data Acquisition Size | 2097152                  |
| Broadband Low Mass    | 202.1 m/z  | No. of Laser Shots   | 10        | Data Processing Size  | 4194304                  |
| Broadband High Mass   | 2400.0 m/z | Laser Power          | 13.6 lp   | Apodization           | Sine-Bell Multiplication |
| Source Accumulation   | 0.001 sec  | Laser Shot Frequency | 0.020 sec |                       |                          |
| Ion Accumulation Time | 0.300 sec  |                      |           |                       |                          |

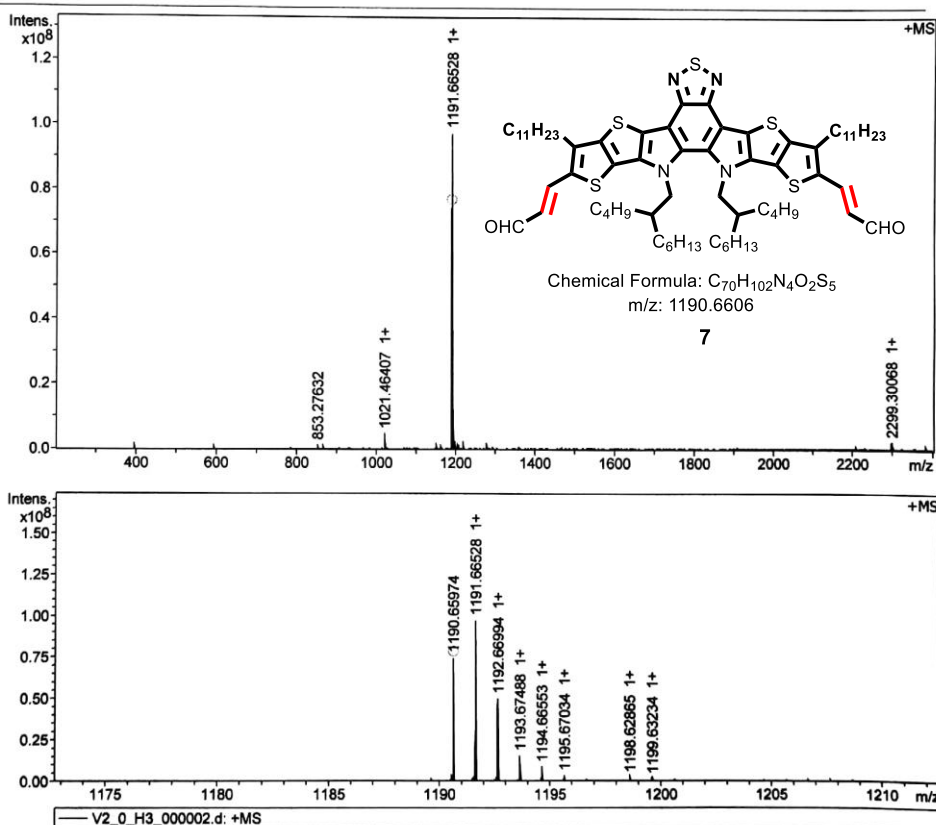

| Meas. m/z  | # | Ion Formula                                                                   | Score  | m/z         | err [ppm] | Mean err [ppm] | mSigma | rdb  | e <sup>-</sup> Conf | N-Rule |
|------------|---|-------------------------------------------------------------------------------|--------|-------------|-----------|----------------|--------|------|---------------------|--------|
| 1190.65974 | 1 | C <sub>70</sub> H <sub>102</sub> N <sub>4</sub> O <sub>2</sub> S <sub>5</sub> | 100.00 | 1190.660085 | 0.3       | -0.7           | 244.8  | 22.0 | odd                 | ok     |

Fig. S17. The MALDI-TOF of compound 7

# MALDI, V3

## Analysis Info

Analysis Name D:\Data\MALDI\2020\0107\V3\_0\_H4\_000001.d  
 Method MALDI\_P\_100-3000  
 Sample Name MURU-N-ESI  
 Comment

Acquisition Date 1/7/2020 5:12:52 PM

Operator  
 Instrument solariX

## Acquisition Parameter

|                       |            |                      |           |                       |                          |
|-----------------------|------------|----------------------|-----------|-----------------------|--------------------------|
| Acquisition Mode      | Single MS  | Acquired Scans       | 2         | Calibration Date      | Tue Jan 7 05:09:25 2020  |
| Polarity              | Positive   | No. of Cell Fills    | 1         | Data Acquisition Size | 2097152                  |
| Broadband Low Mass    | 202.1 m/z  | No. of Laser Shots   | 10        | Data Processing Size  | 4194304                  |
| Broadband High Mass   | 2400.0 m/z | Laser Power          | 13.6 lp   | Apodization           | Sine-Bell Multiplication |
| Source Accumulation   | 0.001 sec  | Laser Shot Frequency | 0.020 sec |                       |                          |
| Ion Accumulation Time | 0.300 sec  |                      |           |                       |                          |

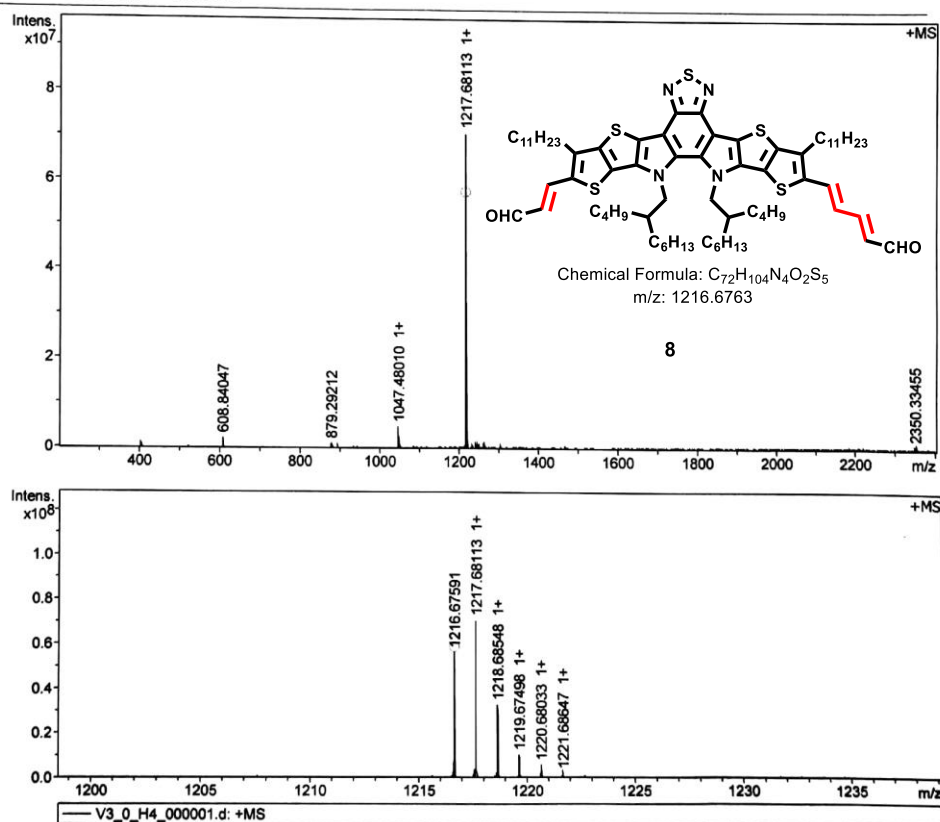

| Meas. m/z   | # | Ion Formula   | Score  | m/z        | err [ppm] | Mean err [ppm] | mSigma | rdb  | e <sup>-</sup> Conf | N-Rule |
|-------------|---|---------------|--------|------------|-----------|----------------|--------|------|---------------------|--------|
| 1216.675910 | 1 | C72H104N4O2S5 | 100.00 | 1216.67535 | 0.1       | -0.9           | 231.3  | 23.0 | odd                 | ok     |

Fig. S18. The MALDI-TOF of compound 8

# MALDI, V4

## Analysis Info

Analysis Name D:\Data\MALDI\2020\0107\V4\_0\_H5\_000001.d  
 Method MALDI\_P\_100-3000  
 Sample Name MURU-N-ESI  
 Comment

Acquisition Date 1/7/2020 5:14:02 PM

Operator  
 Instrument solarix

## Acquisition Parameter

|                       |            |                      |           |                       |                          |
|-----------------------|------------|----------------------|-----------|-----------------------|--------------------------|
| Acquisition Mode      | Single MS  | Acquired Scans       | 2         | Calibration Date      | Tue Jan 7 05:09:25 2020  |
| Polarity              | Positive   | No. of Cell Fills    | 1         | Data Acquisition Size | 2097152                  |
| Broadband Low Mass    | 202.1 m/z  | No. of Laser Shots   | 10        | Data Processing Size  | 4194304                  |
| Broadband High Mass   | 2400.0 m/z | Laser Power          | 13.6 lp   | Apodization           | Sine-Bell Multiplication |
| Source Accumulation   | 0.001 sec  | Laser Shot Frequency | 0.020 sec |                       |                          |
| Ion Accumulation Time | 0.300 sec  |                      |           |                       |                          |

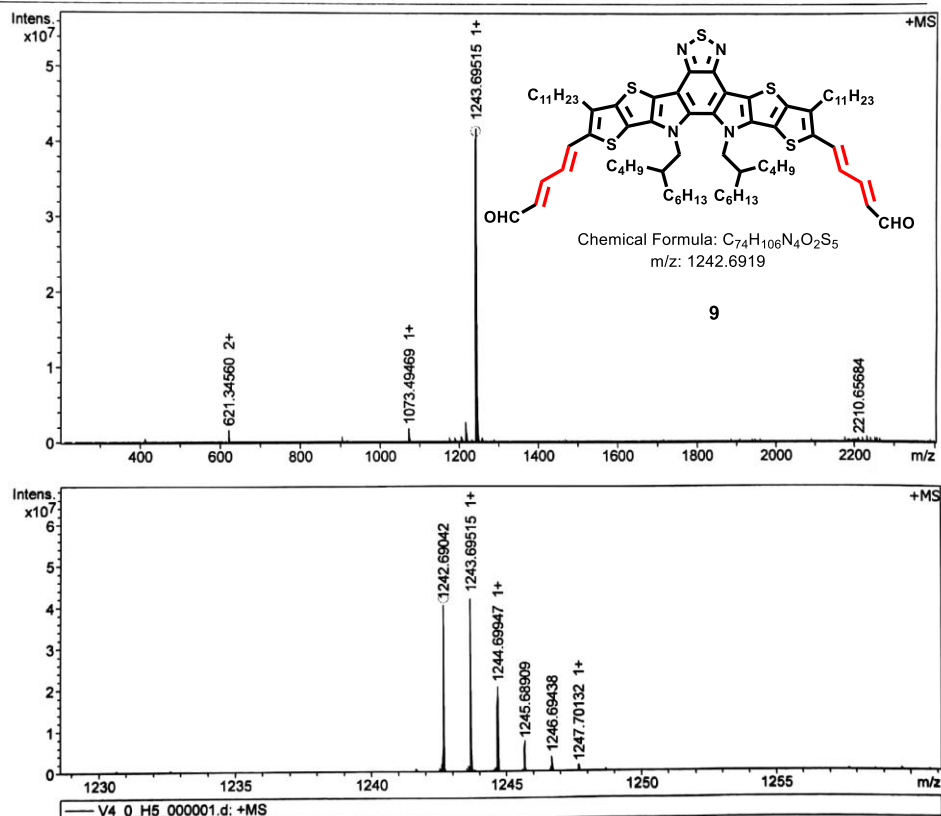

| Meas. m/z   | # | Ion Formula   | Score  | m/z         | err [ppm] | Mean err [ppm] | mSigma | rdb  | e <sup>-</sup> Conf | N-Rule |
|-------------|---|---------------|--------|-------------|-----------|----------------|--------|------|---------------------|--------|
| 1242.690415 | 1 | C74H106N4O2S5 | 100.00 | 1242.691385 | -0.8      | -0.5           | 82.8   | 24.0 | odd                 | ok     |

Fig. S19. The MALDI-TOF of compound 9



# MALDI, HJF16

## Analysis Info

Analysis Name D:\Data\MALDI\2020\0107\HJF16\_0\_H9\_000001.d  
 Method MALDI\_P\_100-3000  
 Sample Name MURU-N-ESI  
 Comment

Acquisition Date 1/7/2020 5:20:30 PM

Operator  
 Instrument solarIX

## Acquisition Parameter

|                       |            |                      |           |                       |                          |
|-----------------------|------------|----------------------|-----------|-----------------------|--------------------------|
| Acquisition Mode      | Single MS  | Acquired Scans       | 2         | Calibration Date      | Tue Jan 7 05:09:25 2020  |
| Polarity              | Positive   | No. of Cell Fills    | 1         | Data Acquisition Size | 2097152                  |
| Broadband Low Mass    | 202.1 m/z  | No. of Laser Shots   | 10        | Data Processing Size  | 4194304                  |
| Broadband High Mass   | 2600.0 m/z | Laser Power          | 13.6 lp   | Apodization           | Sine-Bell Multiplication |
| Source Accumulation   | 0.001 sec  | Laser Shot Frequency | 0.020 sec |                       |                          |
| Ion Accumulation Time | 0.300 sec  |                      |           |                       |                          |

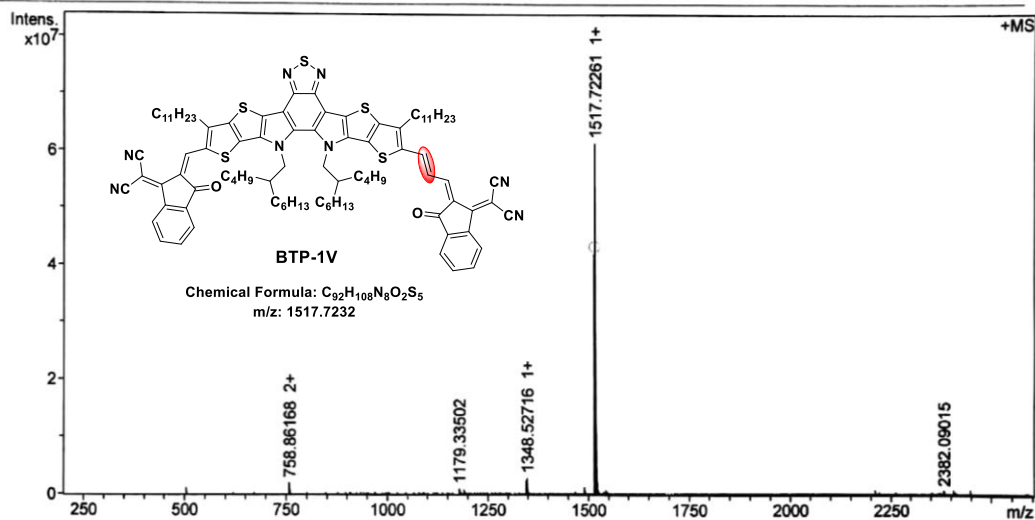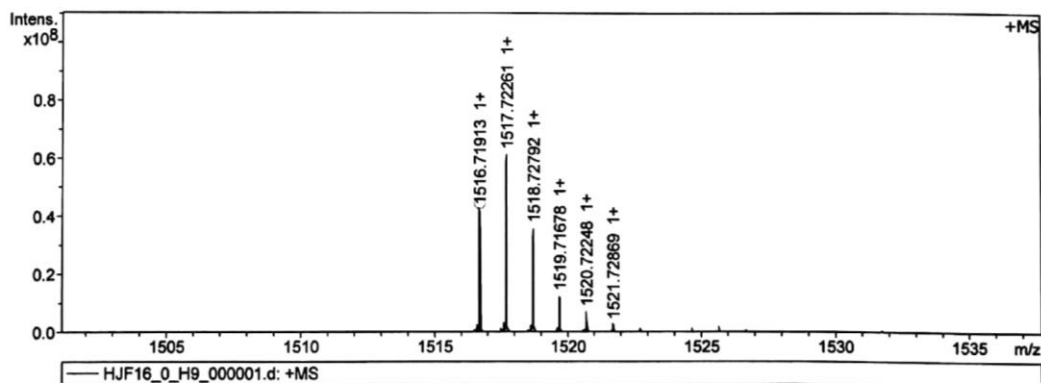

| Meas. m/z   | # | Ion Formula                                                                   | Score  | m/z         | err [ppm] | Mean err [ppm] | mSigma | rdb  | e <sup>-</sup> Conf | N-Rule |
|-------------|---|-------------------------------------------------------------------------------|--------|-------------|-----------|----------------|--------|------|---------------------|--------|
| 1516.719130 | 1 | C <sub>92</sub> H <sub>108</sub> N <sub>8</sub> O <sub>2</sub> S <sub>5</sub> | 100.00 | 1516.719331 | 0.1       | -0.5           | 130.1  | 43.0 | odd                 | ok     |

Fig. S20. The MALDI-TOF of BTP-1V

# MALDI, HJF7

## Analysis Info

Analysis Name D:\Data\MALDI\2020\0107\HJF7\_0\_H7\_000001.d  
 Method MALDI\_P\_100-3000  
 Sample Name MURU-N-ESI  
 Comment

Acquisition Date 1/7/2020 5:17:49 PM

Operator  
 Instrument solariX

## Acquisition Parameter

|                       |            |                      |           |                       |                          |
|-----------------------|------------|----------------------|-----------|-----------------------|--------------------------|
| Acquisition Mode      | Single MS  | Acquired Scans       | 2         | Calibration Date      | Tue Jan 7 05:09:25 2020  |
| Polarity              | Positive   | No. of Cell Fills    | 1         | Data Acquisition Size | 2097152                  |
| Broadband Low Mass    | 202.1 m/z  | No. of Laser Shots   | 10        | Data Processing Size  | 4194304                  |
| Broadband High Mass   | 2600.0 m/z | Laser Power          | 13.6 lp   | Apodization           | Sine-Bell Multiplication |
| Source Accumulation   | 0.001 sec  | Laser Shot Frequency | 0.020 sec |                       |                          |
| Ion Accumulation Time | 0.300 sec  |                      |           |                       |                          |

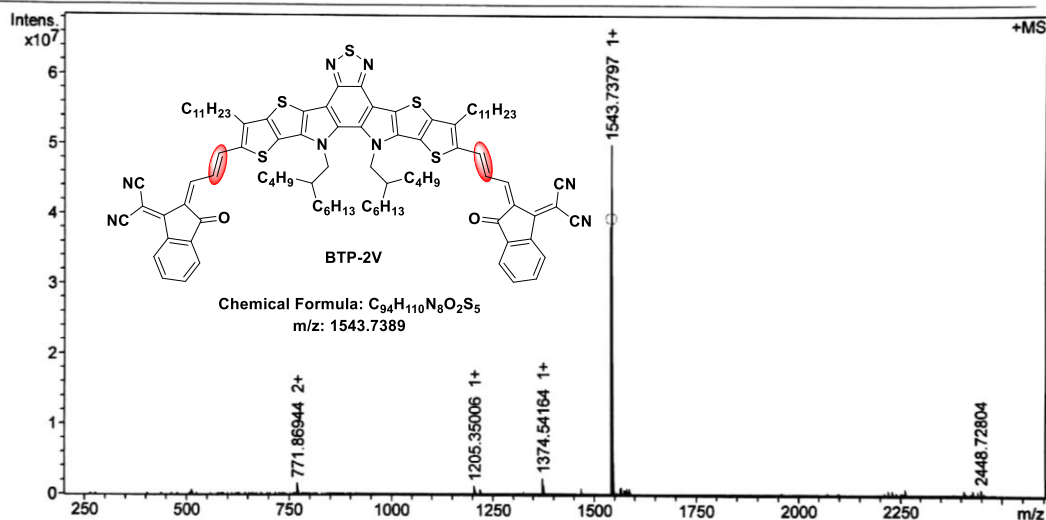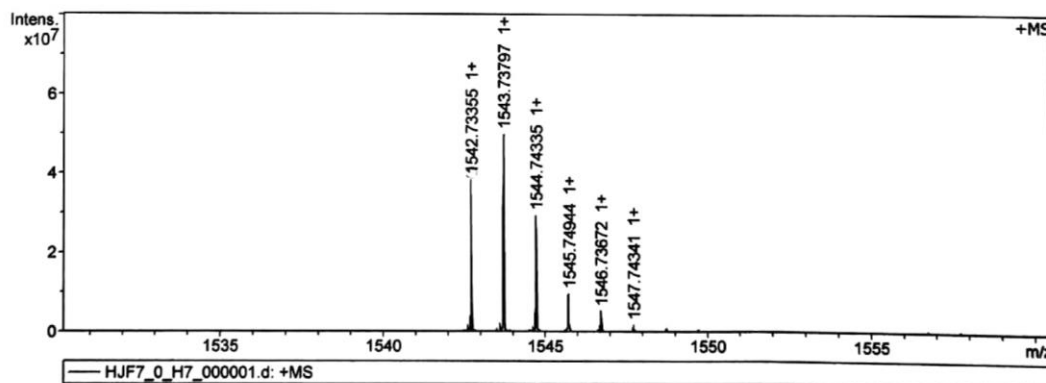

| Meas. m/z   | # | Ion Formula   | Score  | m/z         | err [ppm] | Mean err [ppm] | mSigma | rdb  | e <sup>-</sup> Conf | N-Rule |
|-------------|---|---------------|--------|-------------|-----------|----------------|--------|------|---------------------|--------|
| 1542.733550 | 1 | C94H110N8O2S5 | 100.00 | 1542.734981 | -0.9      | -0.1           | 121.2  | 44.0 | odd                 | ok     |

Fig. S21. MALDI-TOF of BTP-2V

# MALDI, HJF15

## Analysis Info

Analysis Name D:\Data\MALDI\2020\0107\HJF15\_0\_H8\_000001.d  
 Method MALDI\_P\_100-3000  
 Sample Name MURU-N-ESI  
 Comment

Acquisition Date 1/7/2020 5:19:07 PM

Operator  
 Instrument solariX

## Acquisition Parameter

|                       |            |                      |           |                       |                          |
|-----------------------|------------|----------------------|-----------|-----------------------|--------------------------|
| Acquisition Mode      | Single MS  | Acquired Scans       | 2         | Calibration Date      | Tue Jan 7 05:09:25 2020  |
| Polarity              | Positive   | No. of Cell Fills    | 1         | Data Acquisition Size | 2097152                  |
| Broadband Low Mass    | 202.1 m/z  | No. of Laser Shots   | 10        | Data Processing Size  | 4194304                  |
| Broadband High Mass   | 2600.0 m/z | Laser Power          | 13.6 lp   | Apodization           | Sine-Bell Multiplication |
| Source Accumulation   | 0.001 sec  | Laser Shot Frequency | 0.020 sec |                       |                          |
| Ion Accumulation Time | 0.300 sec  |                      |           |                       |                          |

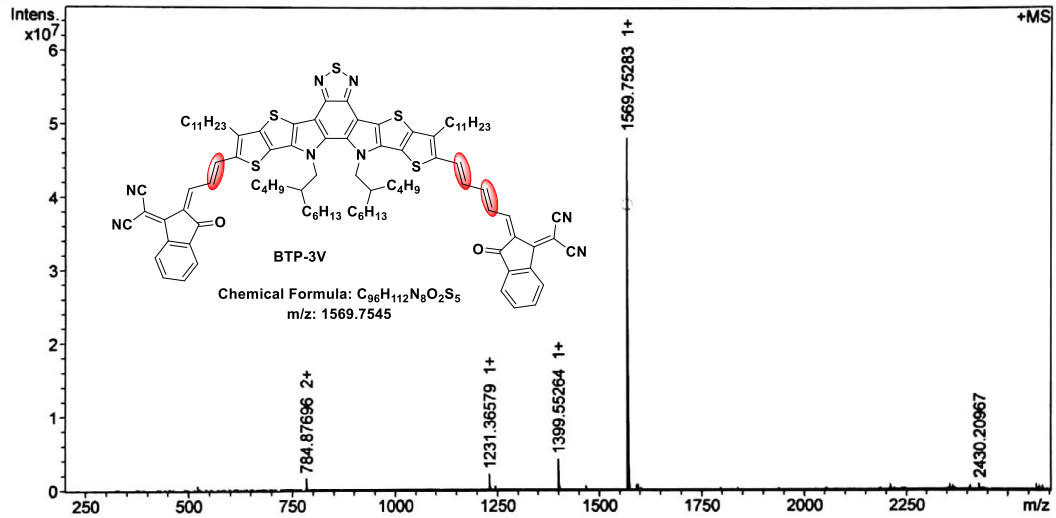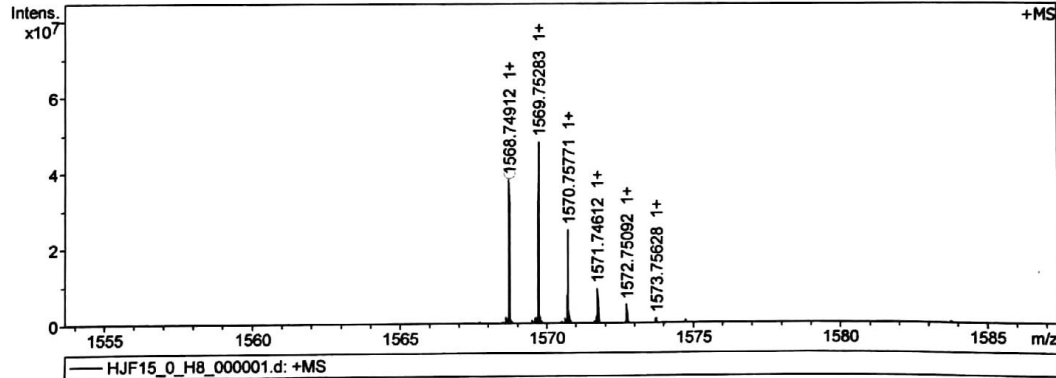

| Meas. m/z   | # | Ion Formula   | Score  | m/z         | err [ppm] | Mean err [ppm] | mSigma | rdb  | e <sup>-</sup> Conf | N-Rule |
|-------------|---|---------------|--------|-------------|-----------|----------------|--------|------|---------------------|--------|
| 1568.749119 | 1 | C96H112N8O2S5 | 100.00 | 1568.750631 | 1.0       | 0.5            | 130.1  | 45.0 | odd                 | ok     |

Fig. S22. MALDI-TOF of BTP-3V

# MALDI,HJF6

## Analysis Info

Analysis Name D:\Data\MALDI\2020\0107\HJF6\_0\_H6\_000001.d  
Method MALDI\_P\_100-3000  
Sample Name MURU-N-ESI  
Comment

Acquisition Date 1/7/2020 5:15:03 PM

Operator  
Instrument solariX

## Acquisition Parameter

|                       |            |                      |           |                       |                          |
|-----------------------|------------|----------------------|-----------|-----------------------|--------------------------|
| Acquisition Mode      | Single MS  | Acquired Scans       | 2         | Calibration Date      | Tue Jan 7 05:09:25 2020  |
| Polarity              | Positive   | No. of Cell Fills    | 1         | Data Acquisition Size | 2097152                  |
| Broadband Low Mass    | 202.1 m/z  | No. of Laser Shots   | 10        | Data Processing Size  | 4194304                  |
| Broadband High Mass   | 2600.0 m/z | Laser Power          | 13.6 lp   | Apodization           | Sine-Bell Multiplication |
| Source Accumulation   | 0.001 sec  | Laser Shot Frequency | 0.020 sec |                       |                          |
| Ion Accumulation Time | 0.300 sec  |                      |           |                       |                          |

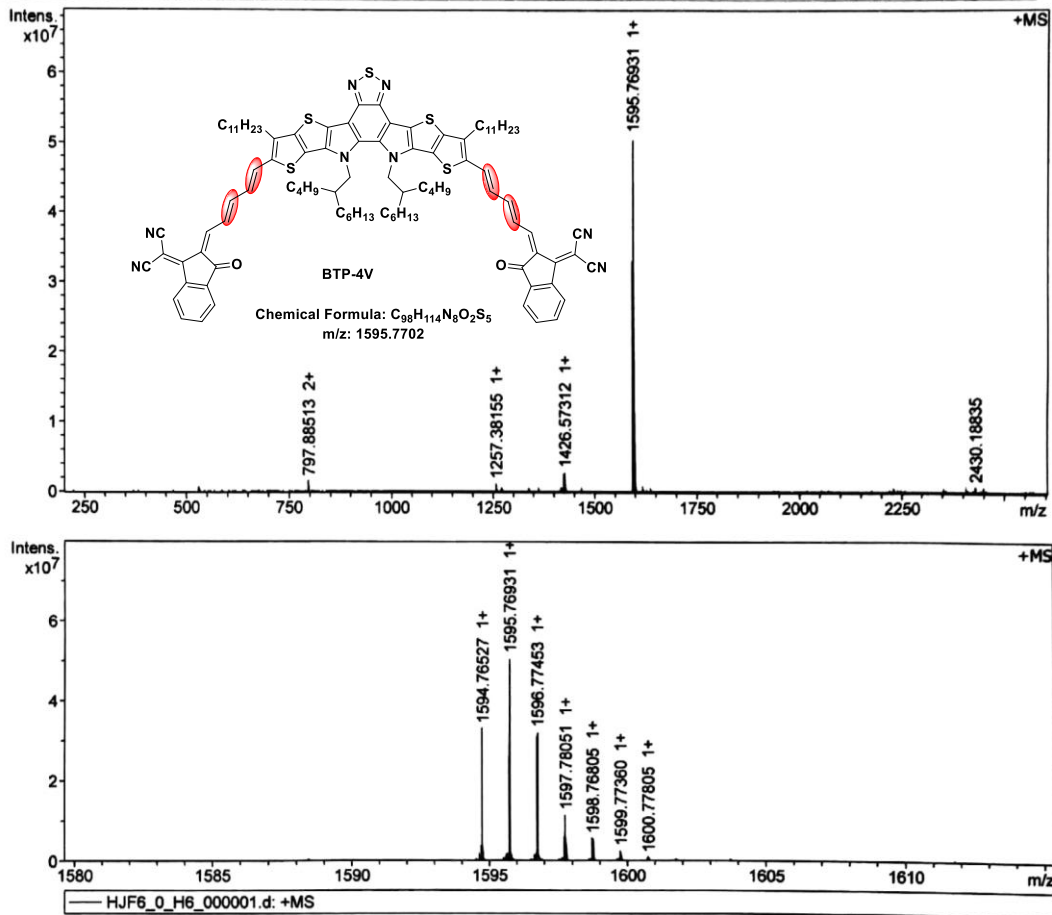

Fig. S23. MALDI-TOF of BTP-4V

## 5. Uv-vis absorption spectra

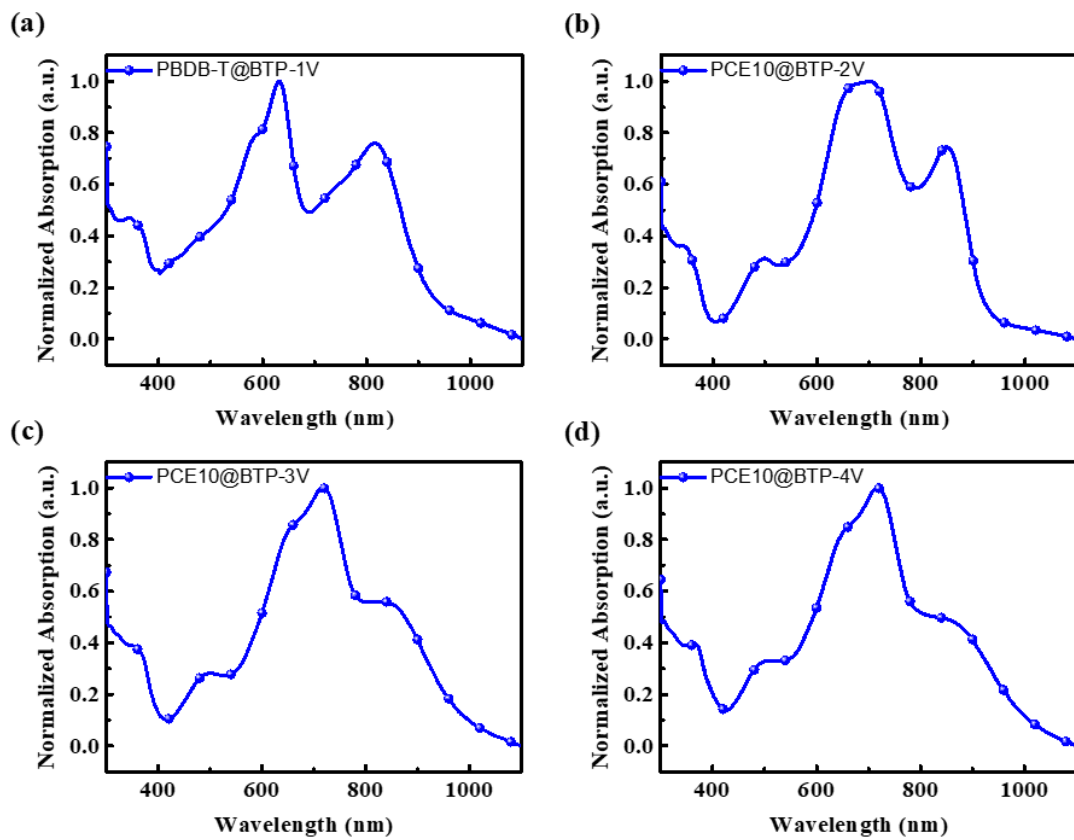

Fig. S24. The absorption spectra of four blend films.

## 6. photoluminescence (PL) spectra

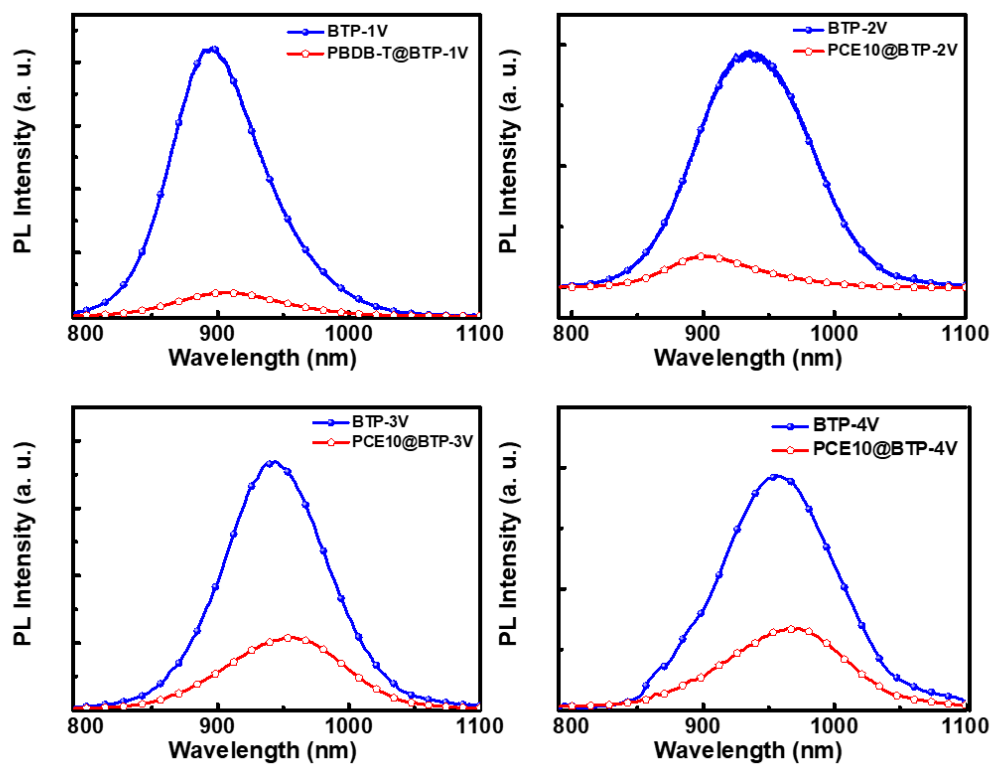

Fig. S25. The photoluminescence (PL) spectra of the neat and blend films

## 7. Cyclic voltammogram

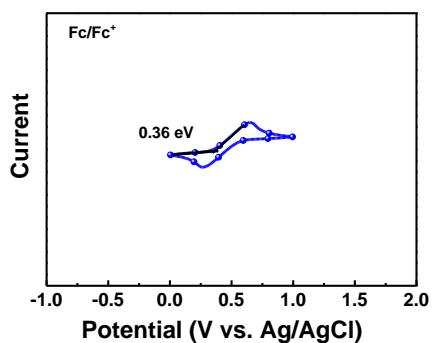

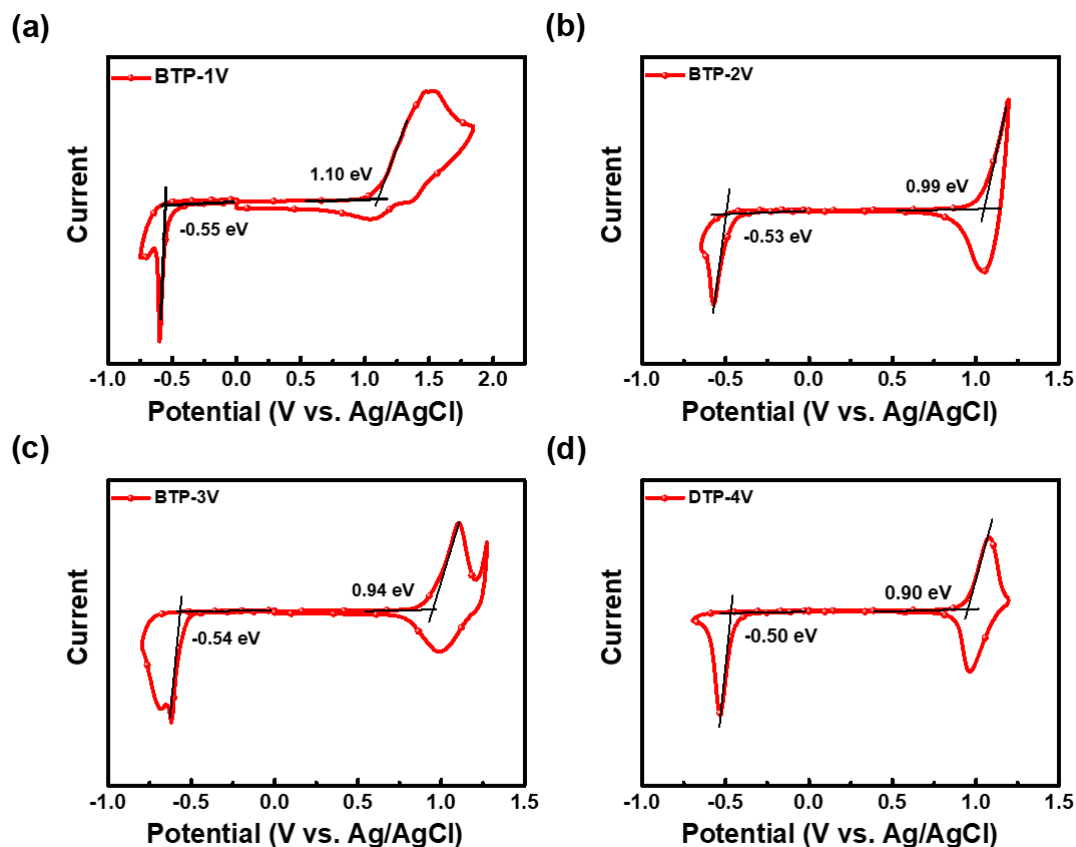

**Fig. S26.** The cyclic voltammograms of four NFAs in  $\text{CH}_3\text{CN}/0.1 \text{ M Bu}_4\text{NPF}_6$ .

## 8. Solar cell fabrication and Characterization

**Solar cell fabrication and testing.** OSCs were made with a device structure of ITO (indium tin oxide)/PEDOT:PSS(poly(3,4-ethylenedioxythiophene): poly (styrene sulfonate))/PBDT-T or PCE10:acceptor/PNDIT-F3N ([9,9-bis(3'-(N,N-dimethylamino)propyl)-2,7-fluorene)-alt-5,5'-bis(2,2'-thiophene)-2,6-naphthalene-1,4,5,8-tetracarboxylic-N,N'-di(2-ethylhexyl)imide])/Ag. The patterned ITO-coated glass was scrubbed by detergent and then cleaned inside an ultrasonic bath by using deionized water, acetone, and isopropyl alcohol sequentially and dried overnight in an oven. Before use, the glass substrates were treated in a UV-Ozone Cleaner for 15 min to improve its work function and clearance. A thin PEDOT: PSS (Heraeus Clevis P VPA 4083) layer was spin-coat onto the ITO substrates at 5000 rpm for 20 s, and then dried at  $150^\circ\text{C}$  for 15 min in air. The PEDOT:

PSS coated ITO substrates were transferred to a N<sub>2</sub>-filled glove box for further processing. The donor: acceptor blends with a weight ratio of 1:1.2 and a total concentration of 15.4 mg/mL dissolved in chloroform. Then the solution was stirred overnight for intensive mixing in a nitrogen-filled glove box. Then, 0.5% DIO or 1-chloronaphthalene (CN) was added to the chloroform solution 30 minutes before spin coating. The blend solution was spin-cast on the top of PEDOT:PSS layer immediately after being stirred on a hotplate of 55°C for 30 minutes at 2000 rpm for 30 s. Then the devices were put into vacuum to remove the additive and annealed at 100°C for 5 min to facilitate phase separation and morphology optimization. A layer of PNDIT-F3N was cast onto the processed active layer, and the Ag layer (~100 nm) was deposited in a thermal evaporator under vacuum of 5×10<sup>-5</sup> Pa through a shadow mask. The current-voltage (*J-V*) characteristic curves of all packaged devices were measured by using a Keithley 2400 Source Meter in air. The photocurrent was measured under AM 1.5G (100 mW cm<sup>-2</sup>) using a Newport solar simulator in an Air. The light intensity was calibrated using a standard Si diode (with KG5 filter, purchased from PV Measurement) to bring spectral mismatch to unity. EQEs were measured using an Enlitech QE-S EQE system equipped with a standard Si diode. Monochromatic light was generated from a Newport 300W lamp source.

**EQE measurements.** EQEs were measured using an Enlitech QE-S EQE system equipped with a standard Si diode. Monochromatic light was generated from a Newport 300W lamp source.

**Hole-mobility measurements.** The hole-mobilities were measured using the space charge limited current (SCLC) method, employing a device architecture of ITO/PEDOT:PSS/blend film/MoO<sub>3</sub>/Al. The mobilities were obtained by taking current-voltage curves and fitting the results to a space charge limited form, where the SCLC is described by:

$$J = 9\varepsilon_0\varepsilon_r\mu(V_{\text{appl}} - V_{\text{bi}} - V_s)^2/8L^3$$

Where  $\varepsilon_0$  is the permittivity of free space,  $\varepsilon_r$  is the relative permittivity of the material



(assumed to be 3),  $\mu$  is the hole mobility and  $L$  is the thickness of the film. Hole mobilities can be found from the plots of  $J^{1/2}$  vs  $V_{appl}-V_{bi}-V_s$ .

**Electron mobility measurements.** The electron mobilities were measured using the SCLC method, employing a device architecture of ITO/ZnO/blend film/PNDIT-F3N/Al. The mobilities were obtained by taking current-voltage curves and fitting the results to a space charge limited form, where the SCLC is described by:

$$J = 9\epsilon_0\epsilon_r\mu(V_{appl}-V_{bi}-V_s)^2/8L^3$$

Where  $\epsilon_0$  is the permittivity of free space,  $\epsilon_r$  is the relative permittivity of the material (assumed to be 3),  $\mu$  is the hole mobility and  $L$  is the thickness of the film. Electron mobilities from the plots of  $J^{1/2}$  vs  $V_{appl} - V_{bi} - V_s$ .

**AFM analysis.** AFM measurements were performed by using a Scanning Probe Microscope Dimension 3100 in tapping mode. All film samples were spin-cast on ITO substrates.

**GIWAXS characterization.** GIWAXS measurements were performed at beamline 7.3.3 at the Advanced Light Source. Samples were prepared on Si substrates using identical blend solutions as those used in devices. The 10 keV X-ray beam was incident at a grazing angle of 0.11°-0.15°, which maximized the scattering intensity from the samples. The scattered X-rays were detected using a Dectris Pilatus 2M photon counting detector. In-plane and out-of-plane sector averages were calculated using the Nika software package. The uncertainty for the peak fitting of the GIWAXS data is 0.3 Å. The coherence length was calculated using the Scherrer equation:

$$L_c = 2\pi K/\Delta q$$

Where  $\Delta q$  is the full-width at half-maximum of the peak and  $K$  is a shape factor (0.94 was used here).

## 9. Charge recombination and carrier mobility

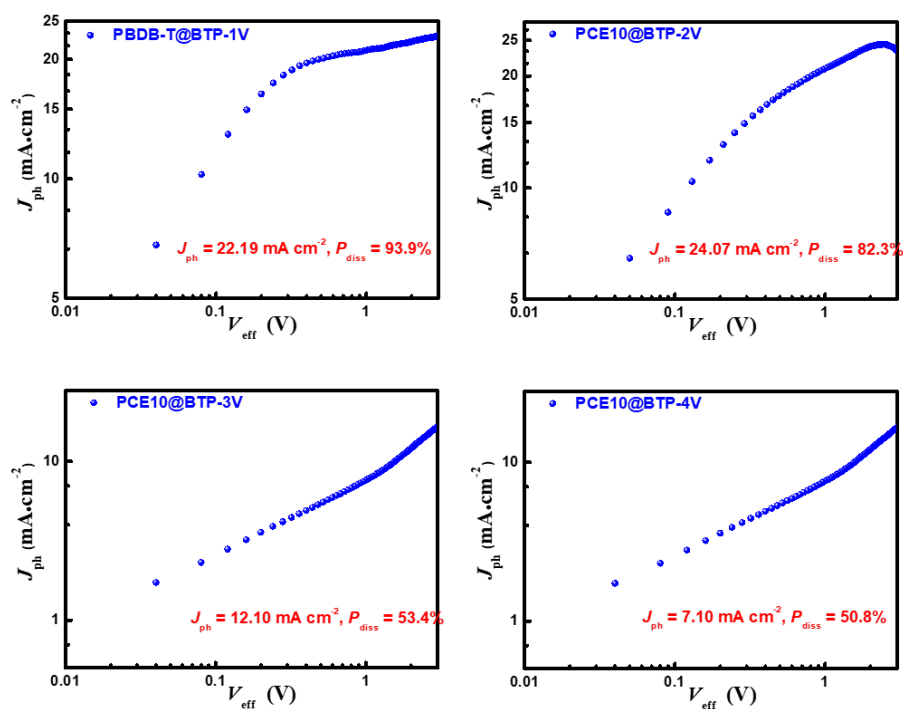

Fig. S27.  $J_{ph}$  versus  $V_{eff}$  of the optimized devices.

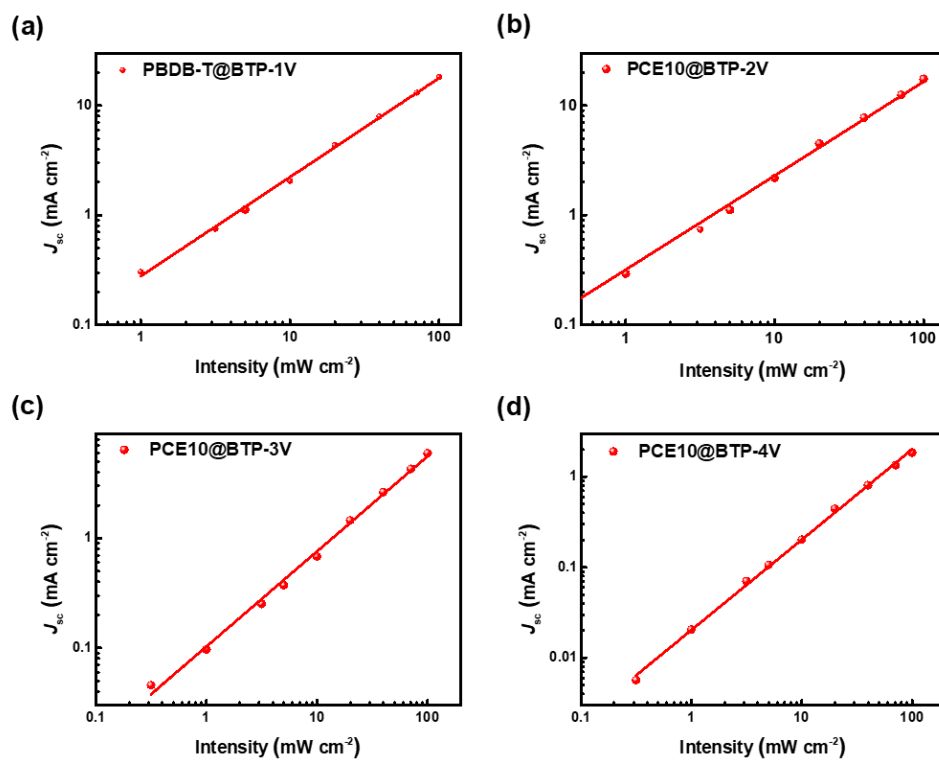

Fig. S28. Light intensity dependency of  $J_{sc}$  of the optimized devices.

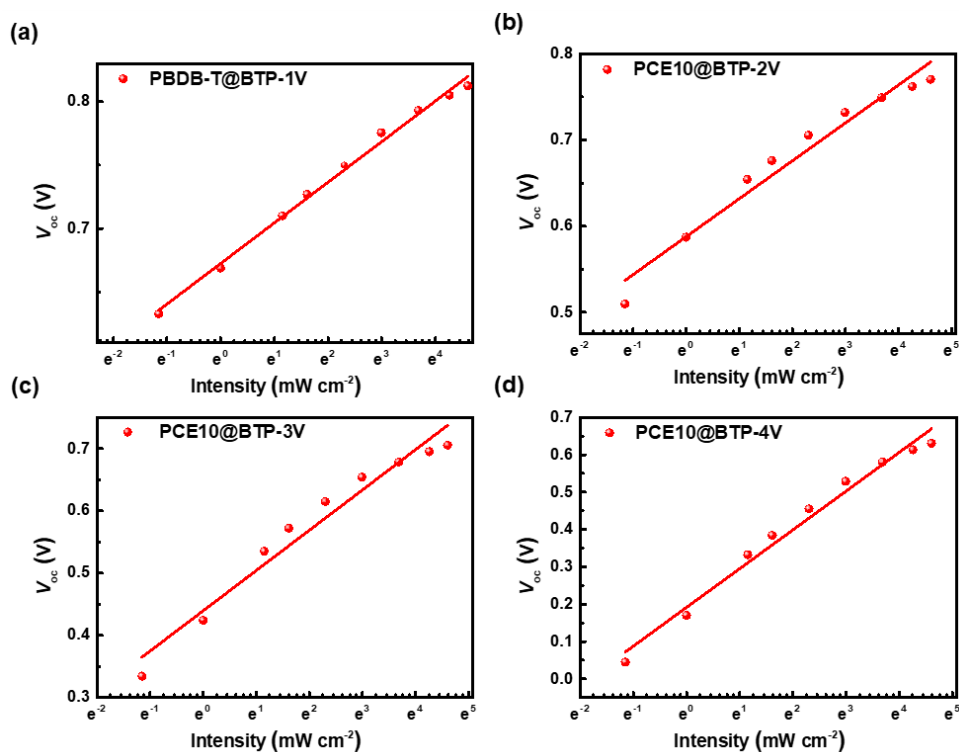

**Fig. S29.** Light intensity dependency of  $V_{oc}$  of the optimized devices.

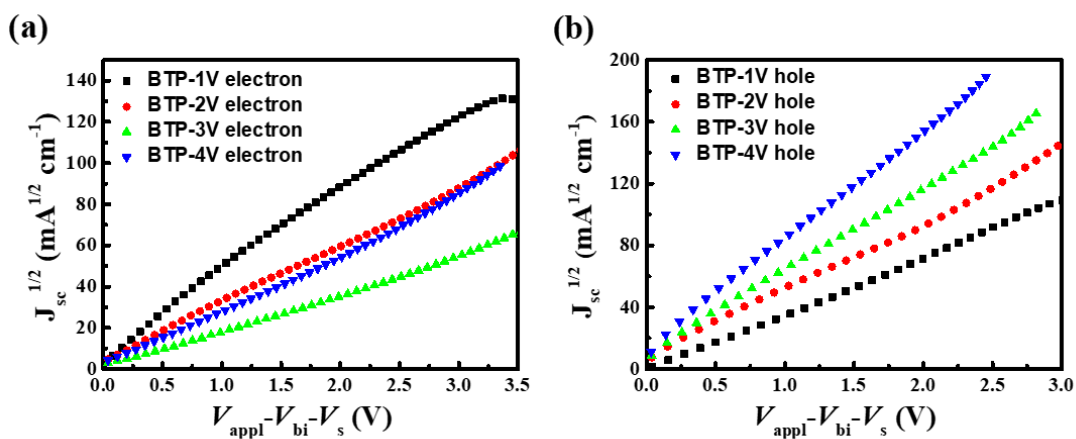

**Fig. S30.** SCLC characteristics of (a) electron-only and (c) hole-only devices based on four blend films.

## 10. $E_g$ calculated from UV-vis absorption and PL spectra

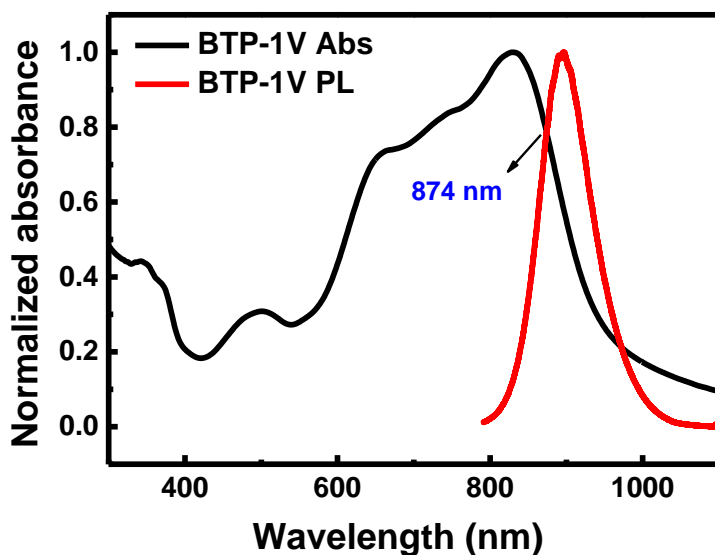

Fig. S31. Normalized UV-vis absorption and PL spectra of BTP-1V.

## 11. Summary of excellent OSCs based on non-halogenated NFAs with IC end group

Table S1. A summary of reported binary single-junction OSCs based on non-halogenated NFAs with IC end group.

| Active layers       | $E_g^{opt}$ (eV) | $V_{oc}$ (V) | $J_{sc}$ (mA/cm <sup>2</sup> ) | FF (%) | PCE (%) | Reference |
|---------------------|------------------|--------------|--------------------------------|--------|---------|-----------|
| FTAZ/IDIC           | 1.62             | 0.84         | 20.8                           | 0.718  | 12.5    | 3         |
| PDBT-T1/IC-C1IDT-IC | 1.70             | 0.92         | 13.39                          | 0.60   | 7.39    | 4         |
| J51/ID-Se-IC        | 1.52             | 0.91         | 15.20                          | 0.62   | 8.6     | 5         |
| PBDB-T/IDTTIC       | 1.51             | 0.92         | 17.3                           | 0.70   | 11.2    | 6         |
| PBDB-T/ITIC-OE      | 1.57             | 0.85         | 14.8                           | 0.67   | 8.5     | 7         |
| MP6/IDIC-C4Ph       | 1.62             | 0.941        | 19.06                          | 0.78   | 14.04   | 8         |
| J61/SJ-IC           | 1.49             | 0.83         | 16.99                          | 0.66   | 9.27    | 9         |
| PBDB-T/ITIC         | 1.59             | 0.899        | 16.81                          | 0.742  | 11.21   | 10        |
| PCE10/ITIC-Th       | 1.60             | 0.88         | 20.88                          | 0.713  | 9.6     | 11        |
| J61/m-ITIC          | 1.58             | 0.91         | 18.31                          | 0.705  | 11.77   | 12        |
| PBDB-T/ITC6-IC      | 1.60             | 0.97         | 16.41                          | 0.73   | 11.61   | 13        |
| PFBDB-T/C8-ITIC     | 1.72             | 0.94         | 19.6                           | 0.72   | 13.2    | 14        |
| PBDD-T/o-F-ITIC     | 1.58             | 0.918        | 18.07                          | 0.67   | 11.11   | 16        |
| PBDTTT-E-T/IEICO    | 1.34             | 0.80         | 18.55                          | 0.62   | 9.19    | 17        |

|                          |             |             |              |             |              |                  |
|--------------------------|-------------|-------------|--------------|-------------|--------------|------------------|
| PBDB-T/6(IDT-3MT)        | 1.52        | 0.95        | 14.43        | 0.613       | 8.40         | 18               |
| PBDB-T/IDT-Tz            | 1.66        | 0.88        | 13.67        | 0.708       | 8.52         | 19               |
| PBDB-T/IDT-BOC6          | 1.63        | 1.01        | 17.52        | 0.54        | 9.6          | 20               |
| FTAZ/ITIC-Th-O/IDIC      | 1.40        | 0.85        | 18.5         | 0.719       | 11.6         | 21               |
| P3HT/TrBTIC              | 1.80        | 0.88        | 13.04        | 0.719       | 8.25         | 22               |
| PBDB-T/DF-PCIC           | 1.59        | 0.91        | 15.66        | 0.72        | 10.14        | 23               |
| PBT1-C/TPTT-IC           | 1.63        | 0.96        | 15.6         | 0.70        | 10.5         | 24               |
| PBDB-T/ITDI              | 1.53        | 0.94        | 13.94        | 0.598       | 8.00         | 25               |
| PBDB-T/FTIC-C6C8         | 1.63        | 0.93        | 18.55        | 0.65        | 11.12        | 26               |
| PBDB-T/FDICTF            | 1.63        | 0.94        | 15.81        | 0.66        | 10.06        | 27               |
| PBDB-T/DTCCIC-C17        | 1.60        | 0.97        | 14.27        | 0.67        | 9.48         | 28               |
| PCE10/DTCC-IC            | 1.59        | 0.95        | 11.23        | 0.56        | 6.0          | 29               |
| PBDB-T/DTCFOIC           | 1.69        | 1.00        | 11.93        | 0.579       | 6.92         | 30               |
| J71/H2FCN-C16            | 1.59        | 0.90        | 18.62        | 0.66        | 11.18        | 31               |
| HFQ <sub>x</sub> -T/BZIC | 1.45        | 0.84        | 12.67        | 0.59        | 6.3          | 32               |
| PBDB-T/Y1                | 1.44        | 0.87        | 22.44        | 0.691       | 13.42        | 33               |
| PBDB-T/Y9                | 1.36        | 0.90        | 23.28        | 0.63        | 13.26        | 34               |
| PBDB-T/Y5                | 1.38        | 0.88        | 22.8         | 0.702       | 14.1         | 35               |
| PCE10/6TIC               | 1.30        | 0.74        | 19.22        | 0.541       | 8.13         | 36               |
| PCE10/4TIC               | 1.26        | 0.70        | 14.58        | 0.487       | 5.26         | 36               |
| <b>PBDB-T/BTP-1V</b>     | <b>1.28</b> | <b>0.84</b> | <b>20.86</b> | <b>0.63</b> | <b>11.03</b> | <b>This work</b> |
| <b>PCE10/BTP-2V</b>      | <b>1.28</b> | <b>0.77</b> | <b>19.80</b> | <b>0.51</b> | <b>7.87</b>  | <b>This work</b> |

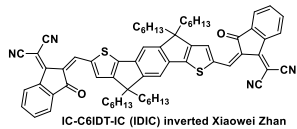

PBDB-T1:IC-C6IDT-IC 1:1  
HOMO = -5.69 eV, LUMO = -3.91 eV,  $E_g^{opt}$  = 1.62 eV  
 $J_{sc}$  = 15.05 mA cm<sup>-2</sup>;  $V_{oc}$  = 0.89 V; FF = 0.63;  
PCE = 8.71%, J. Am. Chem. Soc., 2016, 138, 2973-2976  
9.2% Adv. Energy Mater. 2016, 1600854 inverted  
12.5% FTAZ:IDIC Adv. Mater. 2018, 1706363 inverted

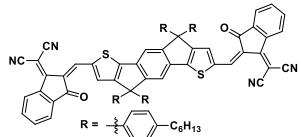

PBDB-T1:IC-C1IDT-IC 1:1  
HOMO = -5.91 eV, LUMO = -3.83 eV,  $E_g^{opt}$  = 1.70 eV  
 $J_{sc}$  = 13.39 mA cm<sup>-2</sup>;  $V_{oc}$  = 0.92 V; FF = 0.60;  
PCE = 7.39%, Adv. Energy Mater. 2016, 1600854

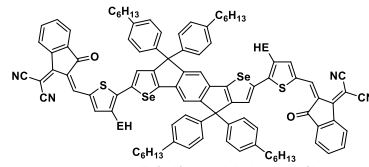

HOMO = -5.45 eV, LUMO = -3.79 eV,  $E_g^{opt}$  = 1.52 eV,  
 $J_{sc}$  = 15.20 mA cm<sup>-2</sup>;  $V_{oc}$  = 0.91 V; FF = 0.62;  
PCE = 8.6%, Energy Environ. Sci., 2016, 9, 3429-3435

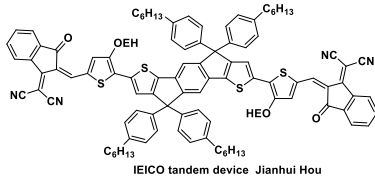

PBDD4T-2F:PC<sub>71</sub>BM (Front Cell) & PBDDTT-E-TIEICO (rare cell)  
HOMO = -5.32 eV, LUMO = -3.95 eV,  $E_g^{opt}$  = 1.34 eV,  
 $J_{sc}$  = 11.51 mA cm<sup>-2</sup>;  $V_{oc}$  = 1.71 V; FF = 0.66;  
PCE = 12.80% Adv. Mater. 2017, 1606340  
PCE = 10.7% Adv. Mater. 2016, 28, 8283-8287 tandem

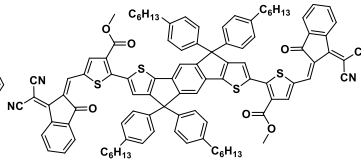

PBDB-T: 6(IDT-3MT) 1:1  
HOMO = -5.68 eV, LUMO = -4.16 eV,  $E_g^{opt}$  = 1.52 eV,  
 $J_{sc}$  = 14.43 mA cm<sup>-2</sup>;  $V_{oc}$  = 0.95 V; FF = 0.613;  
PCE = 8.40%, J. Mater. Chem. C, 2018, 6, 7549-7556

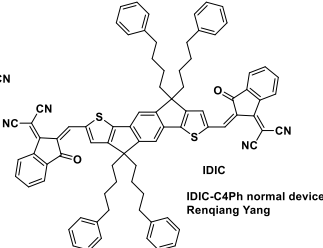

MP6:IDIC-C4Ph 1:1  
HOMO = -5.70 eV, LUMO = -3.93 eV,  $E_g^{opt}$  = 1.62 eV  
 $J_{sc}$  = 19.06 mA cm<sup>-2</sup>;  $V_{oc}$  = 0.941 V; FF = 0.7832;  
PCE = 14.04%, Adv. Mater. 2019, 1807832

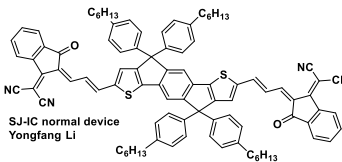

J61: SJ-IC 1:1  
HOMO = -5.61 eV, LUMO = -3.94 eV,  $E_g^{opt}$  = 1.49 eV,  
 $J_{sc}$  = 16.99 mA cm<sup>-2</sup>;  $V_{oc}$  = 0.83 V; FF = 0.659;  
PCE = 9.27% J. Mater. Chem. A, 2017, 5, 22588-22597

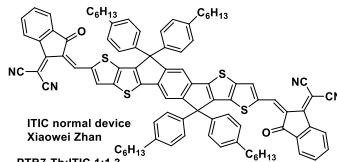

PTB7-Th:ITIC 1:1.3  
HOMO = -5.48 eV, LUMO = -3.83 eV,  $E_g^{opt}$  = 1.59 eV  
 $J_{sc}$  = 14.21 mA cm<sup>-2</sup>;  $V_{oc}$  = 0.81 V; FF = 0.591;  
PCE = 6.8% Adv. Mater. 2015, 27, 1170-1174  
11.2% PBDB-T@ITIC Adv. Mater. 2016, 28, 4734-4739

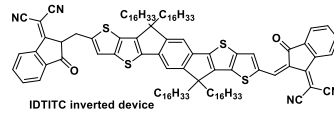

PBDB-T:IDTITC 1:1  
HOMO = -5.68 eV, LUMO = -3.89 eV,  $E_g^{opt}$  = 1.51 eV  
 $J_{sc}$  = 17.3 mA cm<sup>-2</sup>;  $V_{oc}$  = 0.919 V; FF = 0.704;  
PCE = 11.2%, Adv. Funct. Mater. 2018, 1802895

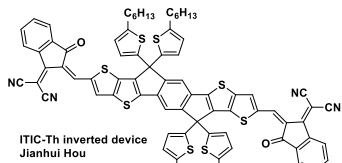

PCE10:ITIC-Th 1:1.3  
HOMO = -5.66 eV, LUMO = -3.93 eV,  $E_g^{opt}$  = 1.60 eV  
 $J_{sc}$  = 20.88 mA cm<sup>-2</sup>;  $V_{oc}$  = 0.88 V; FF = 0.713;  
PCE = 9.6%, J. Am. Chem. Soc. 2016, 138, 4955-4961

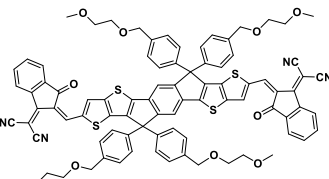

PBDB-T:ITIC-OE 1:1  
HOMO = -5.67 eV, LUMO = -4.03 eV,  $E_g^{opt}$  = 1.57 eV  
 $J_{sc}$  = 14.8 mA cm<sup>-2</sup>;  $V_{oc}$  = 0.85 V; FF = 0.67;  
PCE = 8.5%, J. Mater. Chem. A, 2018, , 395-403

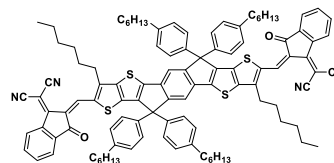

HOMO = -5.73 eV, LUMO = -3.92 eV,  $E_g^{opt}$  = 1.60 eV,  
 $J_{sc}$  = 16.41 mA cm<sup>-2</sup>;  $V_{oc}$  = 0.97 V; FF = 0.73;  
PCE = 11.61%, Adv. Funct. Mater. 2018, 1705095

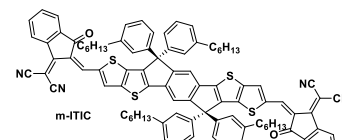

J61:m-ITIC 1:1  
HOMO = -5.52 eV, LUMO = -3.82 eV,  $E_g^{opt}$  = 1.58 eV  
 $J_{sc}$  = 18.31 mA cm<sup>-2</sup>;  $V_{oc}$  = 0.91 V; FF = 0.705;  
PCE = 11.77%, J. Am. Chem. Soc. 2016, 138, 15011-15018

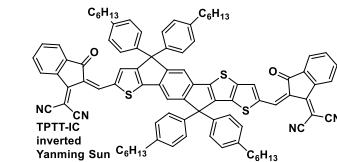

PBT1-C:TPTT-IC 1:1  $M_n$  25.5 PDI 1.76  
HOMO = -5.78 eV, LUMO = -3.95 eV,  $E_g^{opt}$  = 1.63 eV  
 $J_{sc}$  = 15.6 mA cm<sup>-2</sup>;  $V_{oc}$  = 0.96 V; FF = 0.70;  
PCE = 10.5%, J. Mater. Chem. C, 2018, 6, 4873-4877

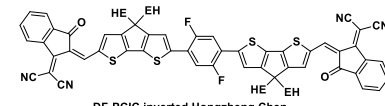

PBDB-T:DF-PCIC 1:1.2  
HOMO = -5.49 eV, LUMO = -3.77 eV,  $E_g^{opt}$  = 1.59 eV  
 $J_{sc}$  = 15.66 mA cm<sup>-2</sup>;  $V_{oc}$  = 0.91 V; FF = 0.72  
PCE = 10.14% Adv. Mater. 2017, 1705208

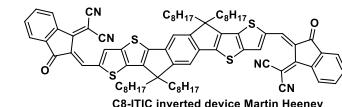

PFBDB-T:C8-ITIC 1:1.25  
HOMO = -5.63 eV, LUMO = -3.91 eV,  $E_g^{opt}$  = 1.72 eV  
 $J_{sc}$  = 19.6 mA cm<sup>-2</sup>;  $V_{oc}$  = 0.94 V; FF = 0.72;  
PCE = 13.2% Adv. Mater. 2018, 30, 1705209

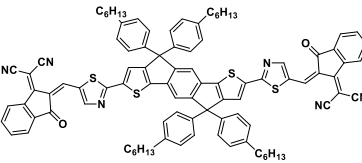

PBDB-T:IDT-Tz 1:1  
HOMO = -5.62 eV, LUMO = -3.96 eV,  $E_g^{opt}$  = 1.66 eV,  
 $J_{sc}$  = 13.67 mA cm<sup>-2</sup>;  $V_{oc}$  = 0.88 V; FF = 0.708;  
PCE = 8.52% J. Mater. Chem. A, 2017, 5, 21674-21678

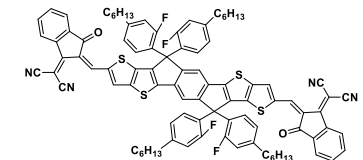

PBDD-T:o-F-ITIC 1.3:1  
HOMO = -5.66 eV, LUMO = -3.94 eV,  $E_g^{opt}$  = 1.58 eV  
 $J_{sc}$  = 18.07 mA cm<sup>-2</sup>;  $V_{oc}$  = 0.918 V; FF = 0.670;  
PCE = 11.11% J. Mater. Chem. A, 2019, 7, 18468-18479

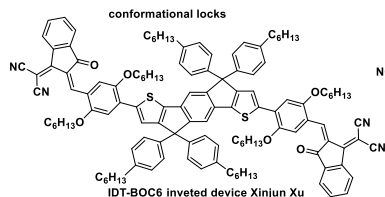

HOMO = -5.51 eV, LUMO = -3.78 eV,  $E_g^{opt}$  = 1.63 eV  
 $J_{sc}$  = 17.52 mA cm<sup>-2</sup>;  $V_{oc}$  = 1.01 V; FF = 0.54;  
 PCE = 9.6%, J. Am. Chem. Soc. 2017, 139, 3356-3359

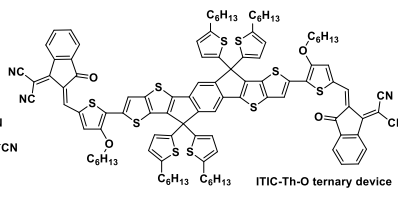

HOMO = -5.35 eV, LUMO = -3.91 eV,  $E_g^{opt}$  = 1.40 eV,  
 $J_{sc}$  = 18.5 mA cm<sup>-2</sup>;  $V_{oc}$  = 0.85 V; FF = 0.719;  
 PCE = 11.6%, Adv. Mater. 2018, 1801501

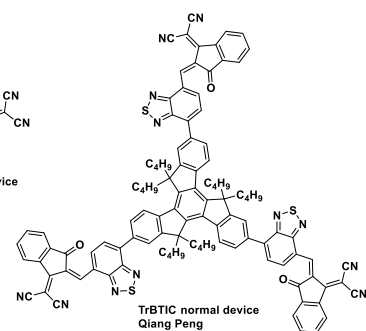

HOMO = -5.56 eV, LUMO = -3.62 eV,  $E_g^{opt}$  = 1.80 eV  
 $J_{sc}$  = 13.04 mA cm<sup>-2</sup>;  $V_{oc}$  = 0.88 V; FF = 0.719;  
 PCE = 8.25%, Adv. Mater. 2019, 31, 1906045

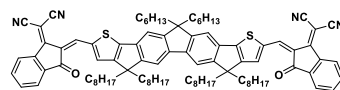

HOMO = -5.64 eV, LUMO = -4.01 eV,  $E_g^{opt}$  = 1.63 eV  
 $J_{sc}$  = 18.55 mA cm<sup>-2</sup>;  $V_{oc}$  = 0.93 V; FF = 0.6472;  
 PCE = 11.12%, J. Mater. Chem. A, 2017, 5, 7776-7783

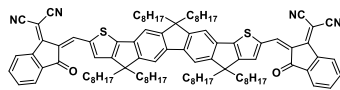

HOMO = -5.43 eV, LUMO = -3.71 eV,  $E_g^{opt}$  = 1.63 eV  
 $J_{sc}$  = 15.81 mA cm<sup>-2</sup>;  $V_{oc}$  = 0.94 V; FF = 0.66;  
 PCE = 10.06%, Adv. Mater. 2016, 201604964

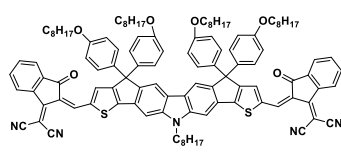

HOMO = -5.50 eV, LUMO = -3.87 eV,  $E_g^{opt}$  = 1.59 eV  
 $J_{sc}$  = 11.23 mA cm<sup>-2</sup>;  $V_{oc}$  = 0.95 V; FF = 0.562;  
 PCE = 6.0%, J. Mater. Chem. A, 2017, 5, 7451-7461

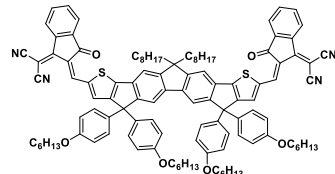

HOMO = -5.63 eV, LUMO = -3.93 eV,  $E_g^{opt}$  = 1.69 eV,  
 $J_{sc}$  = 18.56 mA cm<sup>-2</sup>;  $V_{oc}$  = 0.88 V; FF = 0.641;  
 PCE = 10.41%, J. Mater. Chem. A, 2018, 6, 20313-20326  
 PBDB-T:DTFCOIC 6.92% binary device

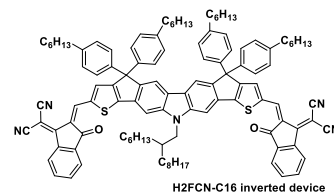

HOMO = -5.95 eV, LUMO = -3.99 eV,  $E_g^{opt}$  = 1.59 eV,  
 $J_{sc}$  = 18.62 mA cm<sup>-2</sup>;  $V_{oc}$  = 0.90 V; FF = 0.66;  
 PCE = 11.18%, Chem. Mater. 2019, 31, 5953-5963

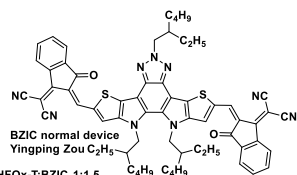

HOMO = -5.42 eV, LUMO = -3.88 eV,  $E_g^{opt}$  = 1.45 eV  
 $J_{sc}$  = 12.67 mA cm<sup>-2</sup>;  $V_{oc}$  = 0.84 V; FF = 0.59;  
 PCE = 6.3%, ACS Appl. Mater. Interfaces 2017, 9, 31985-31992

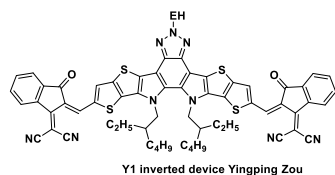

HOMO = -5.45 eV, LUMO = -3.95 eV,  $E_g^{opt}$  = 1.44 eV  
 $J_{sc}$  = 22.44 mA cm<sup>-2</sup>;  $V_{oc}$  = 0.87 V; FF = 0.691;  
 PCE = 13.42%, Nature Communications, 2019, 10(1): 570

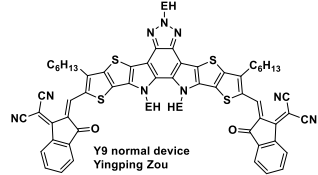

HOMO = -5.59 eV, LUMO = -3.78 eV,  $E_g^{opt}$  = 1.36 eV  
 $J_{sc}$  = 23.28 mA cm<sup>-2</sup>;  $V_{oc}$  = 0.90 V; FF = 0.63,  
 PCE = 13.26%, Journal of Energy Chemistry 2020, 42, 169-173

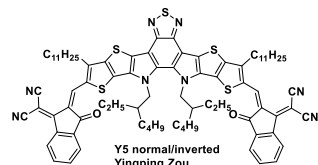

HOMO = -5.55 eV, LUMO = -3.87 eV,  $E_g^{opt}$  = 1.38 eV  
 $J_{sc}$  = 22.8 mA cm<sup>-2</sup>;  $V_{oc}$  = 0.88 V; FF = 0.702;  
 PCE = 14.1%, Adv. Mater. 2019, 1807577  
 J61:Y5 11.3%, TTFQx-T1:Y5 13.1%,

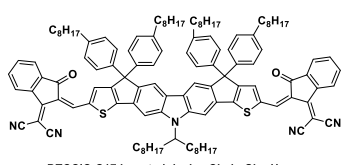

HOMO = -5.46 eV, LUMO = -3.65 eV,  $E_g^{opt}$  = 1.60 eV  
 $J_{sc}$  = 14.27 mA cm<sup>-2</sup>;  $V_{oc}$  = 0.97 V; FF = 0.67;  
 PCE = 9.48%, ACS Appl. Mater. Interfaces 2017, 9, 42035-42042

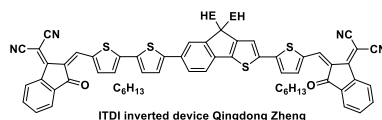

HOMO = -5.89 eV, LUMO = -4.18 eV,  $E_g^{opt}$  = 1.53 eV  
 $J_{sc}$  = 13.94 mA cm<sup>-2</sup>;  $V_{oc}$  = 0.94 V; FF = 0.5978;  
 PCE = 8.00%, ACS Appl. Mater. Interfaces 2017, 9, 24771-24777

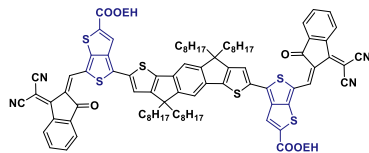

HOMO = -5.34 eV, LUMO = -3.96 eV,  $E_g^{opt}$  = 1.30 eV  
 $J_{sc}$  = 19.22 mA cm<sup>-2</sup>;  $V_{oc}$  = 0.74 V; FF = 0.541;  
 PCE = 8.13%, J. Mater. Chem. C, 2020, 8, 4357-4364

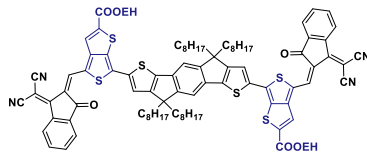

HOMO = -5.36 eV, LUMO = -4.11 eV,  $E_g^{opt}$  = 1.26 eV  
 $J_{sc}$  = 14.58 mA cm<sup>-2</sup>;  $V_{oc}$  = 0.70 V; FF = 0.487;  
 PCE = 5.26%, J. Mater. Chem. C, 2020, 8, 4357-4364

## 12. References

1. J. Yuan, Y. Zhang, L. Zhou, G. Zhang, H.-L. Yip, T.-K. Lau, X. Lu, C. Zhu, H. Peng, P. A.

- Johnson, M. Leclerc, Y. Cao, J. Ulanski, Y. Li and Y. Zou, *Joule*, 2019, 3, 1140-1151.
2. K. Jiang, Q. Wei, J. Y. L. Lai, Z. Peng, H. K. Kim, J. Yuan, L. Ye, H. Ade, Y. Zou and H. Yan, *Joule*, 2019, 3, 3020-3033.
  3. Y. Lin, F. Zhao, S. K. K. Prasad, J.-D. Chen, W. Cai, Q. Zhang, K. Chen, Y. Wu, W. Ma, F. Gao, J.-X. Tang, C. Wang, W. You, J. M. Hodgkiss and X. Zhan, *Advanced Materials*, 2018, 30, 1706363.
  4. Y. Lin, T. Li, F. Zhao, L. Han, Z. Wang, Y. Wu, Q. He, J. Wang, L. Huo, Y. Sun, C. Wang, W. Ma and X. Zhan, *Advanced Energy Materials*, 2016, 6, 1600854.
  5. Y. Li, L. Zhong, F.-P. Wu, Y. Yuan, H.-J. Bin, Z.-Q. Jiang, Z. Zhang, Z.-G. Zhang, Y. Li and L.-S. Liao, *Energy & Environmental Science*, 2016, 9, 3429-3435.
  6. X. Song, N. Gasparini, M. M. Nahid, H. Chen, S. M. Macphee, W. Zhang, V. Norman, C. Zhu, D. Bryant, H. Ade, I. McCulloch and D. Baran, *Advanced Functional Materials*, 2018, 0, 1802895.
  7. C. Duan, X. Liu, B. Xie, Z. Wang, B. Fan, K. Zhang, B. Lin, F. Colberts, W. Ma, R. A. J. Janssen, F. Huang and Y. Cao, *Journal of Materials Chemistry A*, 2017, 6, 395-403.
  8. Y. Li, N. Zheng, L. Yu, S. Wen, C. Gao, M. Sun and R. Yang, *Advanced Materials*, 2019, DOI: doi:10.1002/adma.201807832, 1807832.
  9. X. Li, T. Yan, H. Bin, G. Han, L. Xue, F. Liu, Y. Yi, Z.-G. Zhang, T. P. Russell and Y. Li, *Journal of Materials Chemistry A*, 2017, 5, 22588-22597.
  10. W. Zhao, D. Qian, S. Zhang, S. Li, O. Inganäs, F. Gao and J. Hou, *Advanced Materials*, 2016, 28, 4734-4739.
  11. Y. Lin, F. Zhao, Q. He, L. Huo, Y. Wu, T. C. Parker, W. Ma, Y. Sun, C. Wang, D. Zhu, A. J. Heeger, S. R. Marder and X. Zhan, *Journal of the American Chemical Society*, 2016, 138, 4955-4961.
  12. Y. Yang, Z.-G. Zhang, H. Bin, S. Chen, L. Gao, L. Xue, C. Yang and Y. Li, *Journal of the American Chemical Society*, 2016, 138, 15011-15018.
  13. Z. Zhang, J. Yu, X. Yin, Z. Hu, Y. Jiang, J. Sun, J. Zhou, F. Zhang, T. P. Russell, F. Liu and W. Tang, *Advanced Functional Materials*, 2018, 28, 1705095.
  14. Z. Fei, F. D. Eisner, X. Jiao, M. Azzouzi, J. A. Röhr, Y. Han, M. Shahid, A. S. R. Chesman, C. D. Easton, C. R. McNeill, T. D. Anthopoulos, J. Nelson and M. Heeney, *Advanced Materials*, 2018, 30, 1705209.
  15. X. Liu, X. Wang, Y. Xiao, Q. Yang, X. Guo and C. Li, *Advanced Energy Materials*, 2020, DOI: 10.1002/aenm.201903650, 1903650.
  16. J. Lee, E. M. Go, S. Dharmapurikar, J. Xu, S. M. Lee, M. Jeong, K. C. Lee, J. Oh, Y. Cho, C. Zhang, M. Xiao, S. K. Kwak and C. Yang, *Journal of Materials Chemistry A*, 2019, 7, 18468-18479.
  17. H. Yao, Y. Chen, Y. Qin, R. Yu, Y. Cui, B. Yang, S. Li, K. Zhang and J. Hou, *Advanced Materials*, 2016, 28, 8283-8287.
  18. S. H. Park, G. E. Park, S. Choi, Y. U. Kim, S. Y. Park, C. G. Park, M. J. Cho and D. H. Choi, *Journal of Materials Chemistry C*, 2018, 6, 7549-7556.
  19. S. Yu, Y. Chen, L. Yang, P. Ye, J. Wu, J. Yu, S. Zhang, Y. Gao and H. Huang, *Journal of Materials Chemistry A*, 2017, 5, 21674-21678.
  20. Y. Liu, Z. Zhang, S. Feng, M. Li, L. Wu, R. Hou, X. Xu, X. Chen and Z. Bo, *Journal of the American Chemical Society*, 2017, 139, 3356-3359.



21. C. Pei, W. Jiayu, Z. Qianqian, H. Wenchao, Z. Jingshuai, W. Rui, C. Sheng-Yung, S. Pengyu, M. Lei, Z. Hongxiang, C. Hao-Wen, H. Tianyi, L. Yuqiang, W. Chaochen, Z. Chenhui, Y. Wei, Z. Xiaowei and Y. Yang, *Advanced Materials*, 2018, 0, 1801501.
22. X. Xu, G. Zhang, L. Yu, R. Li and Q. Peng, *Advanced Materials*, 2019, 31, 1906045.
23. S. Li, L. Zhan, F. Liu, J. Ren, M. Shi, C.-Z. Li, T. P. Russell and H. Chen, *Advanced Materials*, 2017, 30, 1705208.
24. C. Li, Y. Xie, B. Fan, G. Han, Y. Yi and Y. Sun, *Journal of Materials Chemistry C*, 2018, 6, 4873-4877.
25. Z. Kang, S.-C. Chen, Y. Ma, J. Wang and Q. Zheng, *ACS Applied Materials & Interfaces*, 2017, 9, 24771-24777.
26. Z. Zhang, M. Li, Y. Liu, J. Zhang, S. Feng, X. Xu, J. Song and Z. Bo, *Journal of Materials Chemistry A*, 2017, 5, 7776-7783.
27. N. Qiu, H. Zhang, X. Wan, C. Li, X. Ke, H. Feng, B. Kan, H. Zhang, Q. Zhang, Y. Lu and Y. Chen, *Advanced Materials*, 2017, 29, 1604964.
28. Y.-T. Hsiao, C.-H. Li, S.-L. Chang, S. Heo, K. Tajima, Y.-J. Cheng and C.-S. Hsu, *ACS Applied Materials & Interfaces*, 2017, 9, 42035-42042.
29. Q. Cao, W. Xiong, H. Chen, G. Cai, G. Wang, L. Zheng and Y. Sun, *Journal of Materials Chemistry A*, 2017, 5, 7451-7461.
30. P. Yin, T. Zheng, Y. Wu, G. Liu, Z.-G. Zhang, C. Cui, Y. Li and P. Shen, *Journal of Materials Chemistry A*, 2018, 6, 20313-20326.
31. Q. Tu, Y. Ma, X. Zhou, W. Ma and Q. Zheng, *Chemistry of Materials*, 2019, 31, 5953-5963.
32. L. Feng, J. Yuan, Z. Zhang, H. Peng, Z.-G. Zhang, S. Xu, Y. Liu, Y. Li and Y. Zou, *ACS Applied Materials & Interfaces*, 2017, 9, 31985-31992.
33. J. Yuan, T. Huang, P. Cheng, Y. Zou, H. Zhang, J. L. Yang, S.-Y. Chang, Z. Zhang, W. Huang, R. Wang, D. Meng, F. Gao and Y. Yang, *Nature Communications*, 2019, 10, 570.
34. M. Luo, L. Zhou, J. Yuan, C. Zhu, F. Cai, J. Hai and Y. Zou, *Journal of Energy Chemistry*, 2020, 42, 169-173.
35. J. Yuan, Y. Zhang, L. Zhou, C. Zhang, T.-K. Lau, G. Zhang, X. Lu, H.-L. Yip, S. K. So, S. Beaupré, M. Mainville, P. A. Johnson, M. Leclerc, H. Chen, H. Peng, Y. Li and Y. Zou, *Advanced Materials*, 2019, 31, 1807577.
36. Z. Zhang, T. Shan, Y. Zhang, L. Zhu, L. Kong, F. Liu and H. Zhong, *Journal of Materials Chemistry C*, 2020, 8, 4357-4364.
